# Supplementary material
Source: PubMed Central journal article supplement (PMC5770972)
Supplement: mmc6.pdf [file mmc6.pdf]

# Direct Numerical Simulation of Cellular-Scale Blood Flow in 3D Microvascular Networks

Peter Balogh<sup>1</sup> and Prosenjit Bagchi<sup>1,\*</sup>

<sup>1</sup>Mechanical and Aerospace Engineering Department, Rutgers, The State University of New Jersey, Piscataway, New Jersey

**ABSTRACT** We present, to our knowledge, the first direct numerical simulation of 3D cellular-scale blood flow in physiologically realistic microvascular networks. The vascular networks are designed following *in vivo* images and data, and are comprised of bifurcating, merging, and winding vessels. Our model resolves the large deformation and dynamics of each individual red blood cell flowing through the networks with high fidelity, while simultaneously retaining the highly complex geometric details of the vascular architecture. To our knowledge, our simulations predict several novel and unexpected phenomena. We show that heterogeneity in hemodynamic quantities, which is a hallmark of microvascular blood flow, appears both in space and time, and that the temporal heterogeneity is more severe than its spatial counterpart. The cells are observed to frequently jam at vascular bifurcations resulting in reductions in hematocrit and flow rate in the daughter and mother vessels. We find that red blood cell jamming at vascular bifurcations results in several orders-of-magnitude increase in hemodynamic resistance, and thus provides an additional mechanism of increased *in vivo* blood viscosity as compared to that determined *in vitro*. A striking result from our simulations is negative pressure-flow correlations observed in several vessels, implying a significant deviation from Poiseuille's law. Furthermore, negative correlations between vascular resistance and hematocrit are observed in various vessels, also defying a major principle of particulate suspension flow. To our knowledge, these novel findings are absent in blood flow in straight tubes, and they underscore the importance of considering realistic physiological geometry and resolved cellular interactions in modeling microvascular hemodynamics.

## INTRODUCTION

Microvascular networks in the human body are made of the smallest blood vessels, namely, the capillaries, arterioles, and venules. They are responsible for gas and nutrient transport to tissues, regulation of blood flow in individual organs, and nearly 80% of the work done by the heart. When normal physiological functions of the microcirculation are hindered, major pathological conditions may ensue. For more than a century, beginning with the celebrated work of Jean L. M. Poiseuille, quantitative studies on blood flow in capillary vessels have provided invaluable insights into microvascular hemodynamics (1). Recent advances in experimental techniques, such as intravital microscopy, have made significant progress in this field. In parallel, progress has been made in the theoretical understanding of microvascular blood flow based on mathematical principles of fluid and particulate transport (2).

High-fidelity *in silico* modeling of blood flow in microvascular networks, however, remains a major challenge.

Blood in small vessels behaves as a concentrated suspension primarily composed of red blood cells (RBCs), which are extremely deformable. Analytical solutions are often limited, and computational modeling is needed that can resolve the dynamics and deformation of individual cells while simultaneously extending to a dense suspension (3,4).

Most cellular-scale modeling studies to date have considered blood flow in simple geometries, such as long, straight tubes of uniform circular cross section, representing an *in vitro*-like setup. In contrast, the architecture of vascular networks is very complex, and is characterized by bifurcating, merging, and winding vessels (5). Furthermore, the network topology varies from organ to organ: vessels in muscles form arcade-type planar networks, whereas those in the retina and kidney have a treelike topology (6). In a tumor, blood vessels can have trifurcations and short-length shunts, adding further complexity to the geometry (7). In many organs, such as the brain, the average length of a vessel segment between two consecutive bifurcations is as small as a few vessel diameters (8,9). Such geometrical differences result in significant deviations in hemodynamics between that achieved in a long straight tube versus a vascular network. For example, the hematocrit and velocity

---

Submitted May 25, 2017, and accepted for publication October 11, 2017.

\*Correspondence: [pbagchi@jove.rutgers.edu](mailto:pbagchi@jove.rutgers.edu)

Editor: James Grotberg.

<https://doi.org/10.1016/j.bpj.2017.10.020>

© 2017 Biophysical Society.

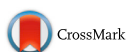

profiles over the cross section of a straight tube is naturally symmetric, but most likely asymmetric *in vivo* (10). Another prominent example is the difference in blood viscosity as determined *in vitro* and *in vivo*. *In vitro* viscosity, which is based on measurements in straight tubes, is found to be less than *in vivo* viscosity by several factors (11). An additional example is the self-sustained spontaneous oscillations in network flows that are absent in straight, unbranched tubes (12–16). Evidently, our understanding of blood flow in simple geometry is often inadequate to address the hemodynamics associated with the complex architecture of microvascular networks.

Direct simulation of cellular-scale blood flow in microvascular networks is, however, a daunting task. As such, alternative lower-dimensional approaches exist as a remedy. They generally involve treating each vessel as a 1D straight conduit, and using Poiseuille's law to specify the pressure-flow relationship (8,15–18). Instead of modeling individual cells, the rheological effects of blood are added using empirical correlations for its viscosity, and measures are taken to account for hematocrit partitioning at vascular bifurcations. Although such approaches are able to consider a large number of vessels and have provided insights into the macro-scale hemodynamics of vascular networks, they lack the ability to resolve the cellular-scale details that are important in many pathophysiological events, such as sequestration and localized adhesion of platelets, leukocytes, and drug particulates. Furthermore, many geometrical features of the networks that are of physiological importance, such as winding and noncircular vessels, are not considered in the lower-dimensional models. Evidently, the next generation of microvascular blood flow modeling must combine the cellular-scale details along with a realistic representation of *in vivo* network geometry.

Toward that end, in this article we present a modeling and analysis of blood flow in microvascular networks that resolves with high fidelity both the large deformation and dynamics of each individual blood cell and the highly complex architecture of the vasculature. To our knowledge, several novel and unusual phenomena with potentially significant physiological consequences are predicted. These anomalies are absent in blood flow in simple geometries, and are the direct result of the interaction between the discrete cells and the complex network architecture. This underscores the importance of utilizing realistic physiological geometries in conjunction with cellular-scale microphysics to better understand microvascular hemodynamics.

## MATERIALS AND METHODS

The numerical approach has been described in detail in our recent work (19), and is based on the immersed boundary method (IBM), which provides an accurate and efficient means of modeling the wide variety of complex interfaces present in microvascular network blood flow. The complex vascular walls are modeled using a sharp-interface ghost node IBM,

whereas the deformable interfaces of the RBCs are modeled using a continuous forcing IBM. Each of these components is seamlessly integrated into the framework of a coupled finite-volume/spectral flow solver. This approach permits the simulation of actual physiological geometry, without requiring any simplifications or assumptions, while simultaneously resolving the cellular-scale details.

Microvascular networks have been constructed *in silico* following published *in vivo* images and data (5,20–23). Three different networks are considered, two of which are shown in Fig. 1, and the third in Fig. S3. All of our networks include bifurcating, merging, and winding vessels as observed *in vivo*. Each network has one main inlet and outlet, and is composed of arterioles, capillaries, and venules. Considering all three networks, there are in total 138 vessels and 45 bifurcations. The vessel diameters range from 6 to 24  $\mu\text{m}$ , and the lengths range from 25 to 165  $\mu\text{m}$ . The average overall path length from inlet to outlet ranges from 500 to 620  $\mu\text{m}$ , and the overall volumes of the regions simulated are  $\sim 1.6 \times 10^6 \mu\text{m}^3$ . The average diameter and length of the capillary vessels are 6 and 68  $\mu\text{m}$ , and the average diameter and length of all vessels are 9 and 65  $\mu\text{m}$ , in agreement with *in vivo* data (5,8,20). In general, the network design utilizes the *in vivo* data in conjunction with Horton's law, which describes the relationships between vessel diameters at bifurcations and mergers, capturing the fractal nature of the topology ((20); for details, see the Supporting Material). In each network the hierarchical structure is such that three orders of the Strahler ordering scheme are spanned on both the arterial and venous sides with the smallest capillaries being order zero. At the capillary level, across each of these topologies, the number of upstream bifurcations ranges anywhere from 2 to 12. The vessels are nondeformable with circular areas, but they generally have variable cross sections along their length.

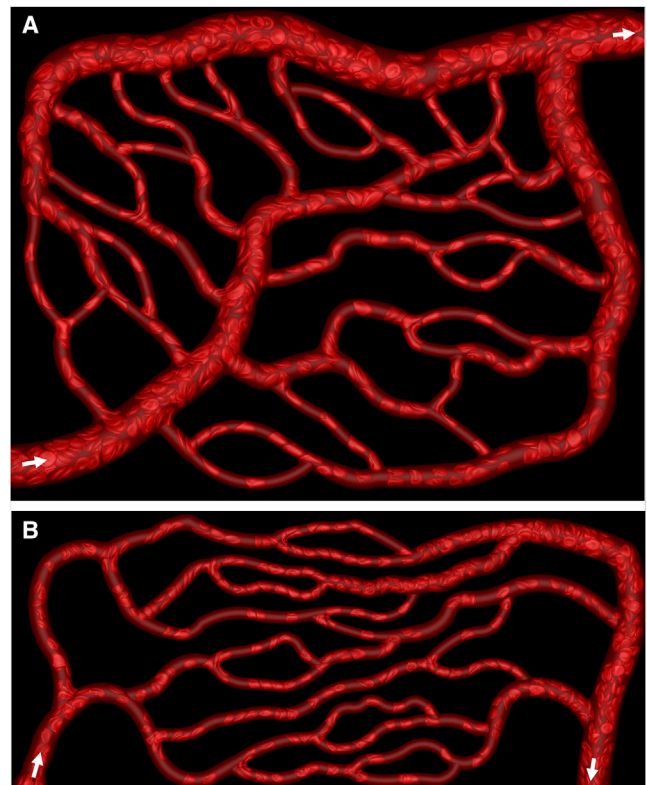

FIGURE 1 Snapshots from our direct simulations of blood flow through microvascular networks. Two of the three networks considered are shown. Additional images, animations, and the third network are given in the Supporting Material. Domain sizes are  $283 \times 222 \times 25 \mu\text{m}$  in (A), and  $386 \times 165 \times 23 \mu\text{m}$  in (B). Arrows indicate inlets and outlets. To see this figure in color, go online.

The network geometry is first constructed using a standard CAD software, and a triangulated mesh is then generated on the vessel surfaces using GMSH (24). This mesh defines in discrete space the vascular boundaries (see Fig. S4) through which the deformable erythrocytes flow. The total number of RBCs in the three networks considered is  $\sim 1550$ . The hematocrit is initially maintained in the main feeding artery at  $\sim 30\%$ , and the subsequent cell distribution throughout the networks naturally develops and evolves. Simulations are performed in which flow is driven through the networks with either fixed pressure-boundary conditions or fixed flow-rate conditions. For pressure-boundary conditions, the overall pressure difference between the inlet and outlet is specified in accordance with published in vivo data as  $(0.3\text{--}1.0) \text{ Pa}/\mu\text{m}$  ( $(3\text{--}10) \times 10^{-3} \text{ cm H}_2\text{O}/\mu\text{m}$ ) (5,23). For flow-rate boundary conditions, the mean flow rate in the main feeding artery is specified as  $(2\text{--}4.6) \times 10^{-13} \text{ m}^3/\text{s}$ , also in agreement with in vivo data (5,23). In total, 12 simulations are performed resulting in  $\sim 550$  time-averaged vessel measurements. Considering the number of RBCs passing through each of the networks over the course of the simulations, there are  $\sim 20,000$  data points utilized for studying RBC behavior at vascular bifurcations.

Table 1 shows the observed range of average flow rates at the simulation boundaries when the pressure drop is specified, and conversely, the observed range of pressure drops between the simulation boundaries when the flow rate is specified. As seen here, the flow rate specified in the second set of simulations is identical to the average flow rate that is observed in the first set of simulations for the midrange-specified pressure drop. Also, the resulting pressure drop in the second set is similar to those specified in the first set of simulations. Thus, there is no significant difference in terms of average pressure drop or flow rate in the two sets of simulations. Furthermore, any observed trends, phenomena, or conclusions drawn, were the same regardless of the type of boundary conditions specified. The exact time-dependent quantities, however, are different in each case because of the stochastic nature of particulate flow.

The resting shape of the RBCs is taken as the experimentally observed biconcave discocyte with an end-to-end distance of  $7.8 \mu\text{m}$ , surface area  $134.1 \mu\text{m}^2$ , and volume  $94.1 \mu\text{m}^3$  (5). A continuum description of the cell is used by representing it as a viscous drop made of hemoglobin surrounded by a zero-thickness (i.e., 2D) hyperelastic membrane. The membrane is assumed to possess resistance against shearing, area dilation, and bending. The shearing deformation and area dilation are described following the strain energy function of Skalak et al. (25):

$$W_E = \frac{G_S}{4} [(I_1^2 + 2I_1 - 2I_2) + CI_2^2], \quad (1)$$

where  $G_S$  is the membrane shear elastic modulus,  $CG_S$  is the area dilation modulus,  $I_1 = \epsilon_1^2 + \epsilon_2^2 - 2$  and  $I_2 = \epsilon_1^2 + \epsilon_2^2 - 1$  are the strain invariants of the Green strain tensor, and  $\epsilon_1$  and  $\epsilon_2$  are the principal stretch ratios. The bending resistance is modeled following Helfrich's formulation for bending energy,

$$W_B = \frac{E_B}{2} \int_S (2\kappa - c_0)^2 dS, \quad (2)$$

where  $E_B$  is the bending modulus,  $\kappa$  is the mean curvature,  $c_0$  is the spontaneous curvature, and  $S$  is the surface area (26). The viscosity of the plasma and hemoglobin is taken to be  $0.001$  and  $0.005 \text{ Pa}\cdot\text{s}$ , respectively. Because inertia is negligible, the fluid motion is governed by the unsteady Stokes equations and the incompressibility condition

$$\rho \frac{\partial \mathbf{u}}{\partial t} = -\nabla p + \nabla \cdot \boldsymbol{\mu} [\nabla \mathbf{u} + \nabla \mathbf{u}^T] \quad (3)$$

$$\nabla \cdot \mathbf{u} = 0. \quad (4)$$

The computational domain resembles a box, and is discretized using a rectangular, fixed (Eulerian) mesh of  $\sim 8 \times 10^7$  points. The entire network along with the RBCs is immersed in this domain. The no-slip condition is satisfied on the vascular walls using the ghost-node IBM, which enforces a constraint on the Eulerian points immediately exterior to the vascular walls (see Supporting Material for additional details). The details of the method and rigorous validations are provided in our prior work (19). The surface of each cell is discretized using 5120 Delaunay triangles. A finite-element method is used to compute the elastic tension  $\mathbf{f}_E$  at each vertex of the surface triangles. An expression of bending force density  $\mathbf{f}_B$  derived from (2) is used. The membrane forces are coupled to the bulk fluid by introducing a source term in the Stokes equation utilizing the 3D Dirac delta function. Details of the computation of  $\mathbf{f}_E$  and  $\mathbf{f}_B$  are given in our previous works along with validations for deformable cells (19,27–29). Further validations and additional salient details of the methodology are provided in the Supporting Material.

**TABLE 1** Two Different Boundary Condition Types Used in the Simulations

|           | Specified $\Delta P'$<br>$\text{Pa}/\mu\text{m}$  | Resulting $Q$<br>$(\text{m}^3/\text{s}) \times 10^{13}$ |
|-----------|---------------------------------------------------|---------------------------------------------------------|
| Network A | 0.340                                             | 3.426                                                   |
|           | 0.450                                             | 4.627                                                   |
|           | 0.663                                             | 7.278                                                   |
| Network B | 0.528                                             | 2.073                                                   |
|           | 0.696                                             | 2.839                                                   |
|           | 1.018                                             | 4.131                                                   |
| Network C | 0.525                                             | 1.469                                                   |
|           | 0.698                                             | 2.055                                                   |
|           | 1.018                                             | 3.344                                                   |
|           | Specified $Q(\text{m}^3/\text{s}) \times 10^{13}$ | Resulting $\Delta P' \text{Pa}/\mu\text{m}$             |
| Network A | 4.627                                             | 0.429                                                   |
| Network B | 2.839                                             | 0.712                                                   |
| Network C | 2.055                                             | 0.777                                                   |

Specified pressure drop and resulting average flow rate, and specified flow rate and resulting average pressure drop between the simulation boundaries.

## RESULTS

Snapshots of our simulations for two of the networks are shown in Fig. 1. Animations and additional images are given in Figs. S1, S2, and S3, and Movies S1 and S2. As seen here, our virtual microvascular networks are highly complex in geometry and representative of realistic in vivo situations. Cell distributions naturally develop in the networks based on the architecture. Some vessels are observed to be filled with RBCs, whereas others have a reduced number of cells, as is the case in vivo. Extreme deformation and a wide range of RBC shapes are observed as they flow through the networks. In the smallest capillary vessels, cells are observed to assume elongated bullet/parachute and slipper shapes, and flow in a tight-filled, single-file manner. The shapes are never axisymmetric, due to the geometric effects. Two- and multifile motions are observed in larger vessels. In the main feeding and collecting vessels, discoid shapes

are often observed. Formation of cell-free regions near vascular walls, and plasma skimming at arterial bifurcations, are observed here. The predicted shapes of individual cells in capillary vessels agree well with experimentally observed shapes, and are compared in Fig. S5.

### Comparison with in vivo data

Fig. 2 A provides a quantitative comparison of vascular flow resistance determined from our simulations against in vivo data (23) obtained in the mesentery of a cat. The simulation data reported is from all three networks with each of the considered boundary conditions. Data is time-averaged over  $\sim 0.7$  s, during which time the transient patterns in flow properties in each of the network vessels are in a quasi-steady (cyclic) state. Each simulation data point in the figure is the time-averaged data from one vessel, with the corresponding vessel diameter on the abscissa. The time-averaged flow resistance per unit length of a vessel is defined as  $R = \Delta P' / Q$ , where  $\Delta P'$  and  $Q$  are the time-averaged pressure drop per unit length and flow rate, respectively, in each vessel. A good agreement between the simulations and the in vivo data is noted. The resistance is maximum at the capillaries and decreases on both the arterial and venous sides with a fourth-order dependence on vessel diameter, as in a Poiseuille's law relationship. Comparisons of predicted time-averaged pressure drop, wall shear stress, and blood viscosity also agree well with in vivo data, and are shown in Fig. S6.

Comparisons are made with in vivo data to generally show that predictions from the in silico networks are quantitatively very similar to what has been observed in vivo. It is noted that in physiology the architecture of a network is organ-specific, and thus the simulated networks for this work are more of an average representation of a network structure or hierarchy. As such, the simulation results presented in the subsequent sections are not intended to be representative of what would be found only in the network of a particular organ. Rather, our conclusions and observations represent commonalities associated with general microvascular network topology.

A hallmark of microvascular blood flow is heterogeneity. Prior in vivo studies have reported wide variations of hemodynamic quantities across different vessels within a network (5,23). Our simulation data reveal a similar heterogeneity. Fig. 2 A shows that the flow resistance can vary by a factor of 4 in vessels of the same diameter within a network. Time-averaged pressure drop per vessel length is presented in Fig. 2 B, which shows nearly an order-of-magnitude variation across capillaries of similar diameters, implying a high-degree of heterogeneity. Fig. 2 C presents the distribution of time-averaged hematocrit. A high degree of heterogeneity is also observed here, where  $H_t$  is seen to range from  $\sim 0.04$  to 0.35 in the capillaries. This observation also qualitatively agrees with in vivo studies reporting that whereas some capillary vessels are filled with cells, some are almost devoid of cells. Interestingly, we note that the degree of heterogeneity decreases with increasing vessel diameter. This is expected, as it is shown later that the underlying mechanism of heterogeneity is the particulate nature of blood, which has a diminishing effect with increasing vessel diameter. A similar high degree of heterogeneity is also observed in the time-averaged flow rate, wall shear stress, and blood viscosity as predicted by our simulations, and is shown in Figs. S6 and S7.

### Temporal heterogeneity

The heterogeneity discussed in prior in vivo studies and shown in Fig. 2 from our simulations represents spatial heterogeneity, i.e., the data for each vessel is averaged over time. In addition to this spatial heterogeneity, our simulations reveal a temporal heterogeneity. That is, hemodynamic quantities show a high degree of variation over time even within one vessel in a network. Variations of flow resistance and hematocrit over time are shown in Fig. 3, A and B, for a specific vessel. As seen here, over time  $H_t$  varies from  $\sim 0.13$  to 0.41, and  $R$  varies from  $\sim 650$  to  $3200 \text{ Pa}/(\text{m}^3/\text{s})/\mu\text{m} \times 10^{-11}$  ( $500\text{--}2400 \text{ mm Hg}/(\text{mm}^3/\text{s})/\mu\text{m}$ ) in the specific vessel considered. Similar temporal fluctuations in pressure drop and flow rate are also observed (data given in Fig. S8).

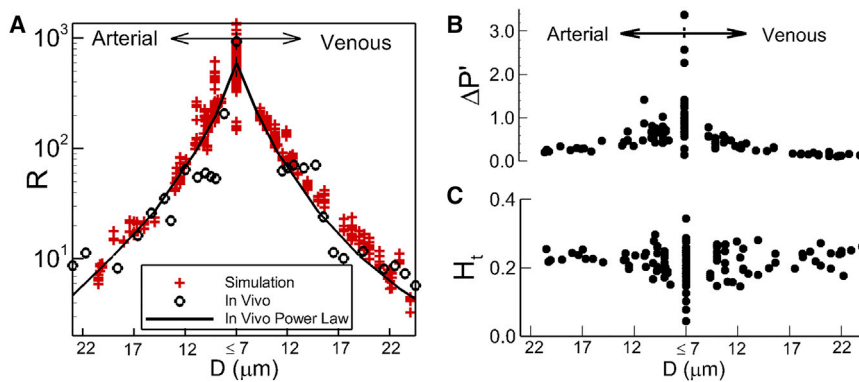

FIGURE 2 (A) Given here is a comparison of predicted time-averaged vascular resistance  $R$  per unit length (red symbols (in  $\text{Pa}/(\text{m}^3/\text{s})/\mu\text{m} \times 10^{-11}$ ) against in vivo data (black circles) and fourth-order power law (line) fit of in vivo data (23). (B and C) Given here is a time-averaged pressure drop per unit length  $\Delta P'$  (in  $\text{Pa}/\mu\text{m}$ ) and hematocrit in different vessels across the networks. To see this figure in color, go online.

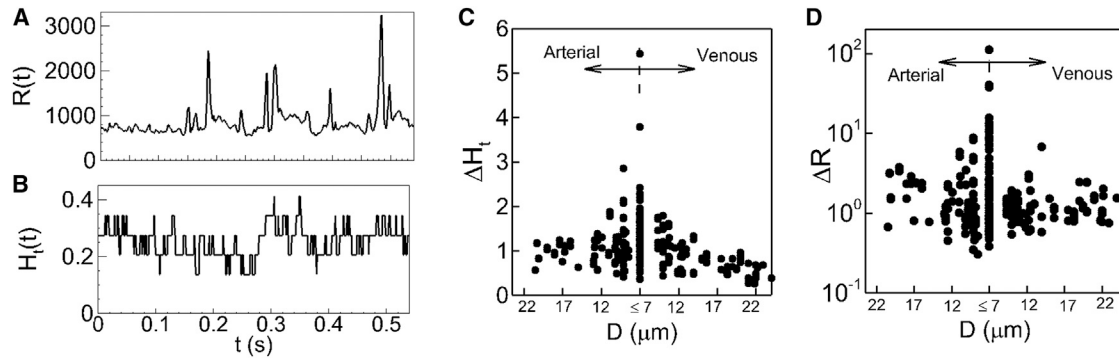

FIGURE 3 Temporal heterogeneity. (A and B) Given here is the time history of resistance  $R(t)$  (in  $\text{Pa}/(\text{m}^3/\text{s})/\mu\text{m} \times 10^{-11}$ ) and hematocrit  $H_t(t)$  in one vessel in the network shown in Fig. 1 A. (C and D) Shown here are the amplitudes of temporal variations in hematocrit ( $\Delta H_t$ ) and resistance ( $\Delta R$ ) in each vessel.

To quantify the degree of temporal heterogeneity, we measure the amplitude of fluctuation, defined as the difference between the maximum and minimum of flow quantities over the entire simulation time. We then plot the amplitudes scaled by the mean quantities for each vessel in the networks. Fig. 3, C and D, shows distributions of the hematocrit amplitude  $\Delta H_t$ , and resistance amplitude  $\Delta R$ . As seen here, the amplitudes exhibit large variations within individual vessels of similar size.  $\Delta H_t$  varies from  $\sim 0.35$  to 5, implying that  $H_t$  in a specific vessel at some instances is five times higher than the average value. Distribution of  $\Delta R$  is even more dispersed as it varies from  $\sim 0.35$  to  $>100$ , implying that in a specific vessel, flow resistance at certain time instances can be 100-times the average value. Temporal heterogeneity is also observed in pressure drop and flow rate, and is given in Fig. S8. Flow-rate and pressure-drop amplitudes are observed to be as high as 180 and 600%, respectively, of the average values. The magnitude of the time-dependent variable amplitudes is, therefore, significant. Such temporal heterogeneity could be more severe than the spatial heterogeneity when Figs. 2 and 3 are compared. Similar to the spatial heterogeneity, the temporal heterogeneity is maximum in the capillary vessels, and decreases with increasing vessel diameter. The temporal heterogeneity is entirely due to the particulate nature of the blood, which becomes more pronounced in smaller vessels. It would not occur in absence of the cells, and the flow would remain steady.

Note that temporal fluctuations in flow quantities are also present in long, straight vessels, but with significantly smaller amplitudes, often in the range of a few percentage of the mean. In contrast, temporal fluctuations observed in our network simulations exhibit amplitudes that are several factors, and often orders, higher than the mean. As shown later, such temporal fluctuations have severe consequences in pressure-flow and hematocrit-resistance correlations.

### RBC jamming at vascular bifurcations

We find that the origin of this significant temporal heterogeneity in the networks is the dynamics of the cell suspension near vascular bifurcations. At all of the vascular bifurcations in the three networks considered, RBCs tend to linger for a while before eventually flowing into the daughter vessels (Fig. 4 A; see Figs. S9 and S10 for additional images; Movies S3 and S4). Although lingering is observed at all bifurcations, it is most pronounced at the capillary bifurcations. During such events, cells near the bifurcations significantly stretch and straddle around both daughter vessels, causing incoming cells to pile up and partly block the entrance to the daughter vessels. Consequently, the flow rates in the daughter vessels are reduced. Lingering is a dominant event observed in our simulations. It can be easily noticed in all of the animations provided in the Supporting Material. Under extreme cases, the lingering is observed to be so severe that it can jam a

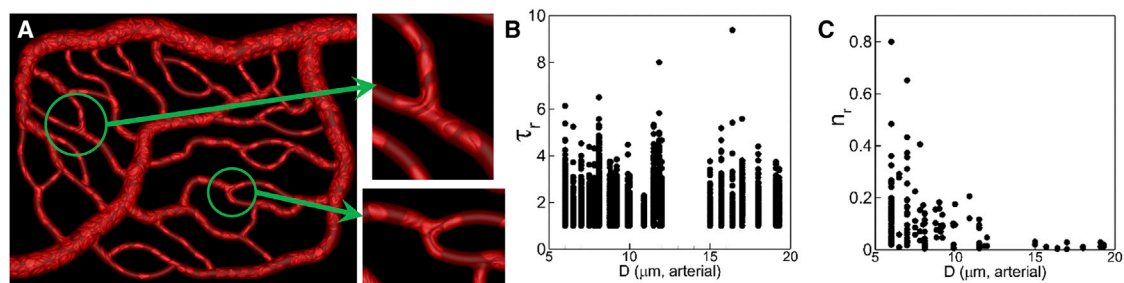

FIGURE 4 (A) RBCs are observed to linger (or, jam) at capillary bifurcations. (B and C) Given here is RBC residence time  $\tau_r$  (dimensionless) and frequency of lingering  $n_r$  at bifurcations. To see this figure in color, go online.

bifurcation and nearly stop the flow in the affected branches (see Fig. S11; Movies S3 and S4).

To quantify the lingering phenomenon, we compute the dimensionless residence time  $\tau_r = t_r/t_0$  of each cell, where  $t_r$  is the time spent by an RBC lingering at a bifurcation and  $t_0$  is the time taken by an RBC to pass through the bifurcation without lingering. We also compute the frequency  $n_r$  of lingering as the ratio of the number of cells lingering for an extended time to the total number of cells passing through a bifurcation over the entire simulation time. Both quantities are plotted in Fig. 4, B and C, as functions of arterial diameter. As seen here, on average the maximum  $t_r$  varies between 4 and 6 over the entire range of diameters considered. This means that at all vascular bifurcations cells can linger 4–6 times longer than the time it would take without lingering. Therefore, the lingering time is significant, and it occurs in all arterial bifurcations. Further, the frequency of lingering is the highest in the capillary vessels and decreases with increasing vessel diameter. Thus, the lingering events are more frequent at the capillary bifurcations.

We find that during a lingering event, the cells at the bifurcation can straddle the daughter vessels either symmetrically or asymmetrically (Fig. 5, A–C; Figs. S9 and S10; Movies S3 and S4). In many bifurcations, we find that the cell lingering occurs in a periodic manner in which the cells straddle more near one daughter vessel at one time, but near the other daughter vessel at other times (Fig. 5, B and C). This is because when cells linger asymmetrically, hematocrit is reduced in the branch that is partially blocked, but is increased in the other

branch. As hematocrit builds up, cells start to straddle the second branch, freeing up the first branch which was blocked before. This periodic change in asymmetric lingering favoring one branch or the other requires a continuous influx of cells in the mother vessel. If for any reason hematocrit in the mother vessel is significantly reduced, an asymmetric lingering favoring one daughter vessel can last much longer. Often times we find that as an asymmetric lingering switches from one side to the other, a symmetric lingering can occur in between (Fig. 5). We further find that a symmetric blockage lasts for a longer time, whereas an asymmetric lingering occurs more frequently.

### Cell lingering results in hematocrit reduction upstream and downstream

An immediate consequence of the cell lingering is a reduction of hematocrit in daughter vessels. The hematocrit reduction is manifested by formation of voids in the RBC train, i.e., vessel segments that are devoid of cells (Fig. 5, A–C). For a symmetric lingering, voids are formed in both daughter vessels, whereas for an asymmetric lingering void, formation switches between one branch and the other depending upon which daughter vessel is temporarily blocked. During the periods of time when asymmetric lingering events are predominantly occurring, the flow rates between the two daughter branches tend to be imbalanced. Conversely, when symmetric lingering events are occurring, the flow rates tend to be balanced. Such cycling can be

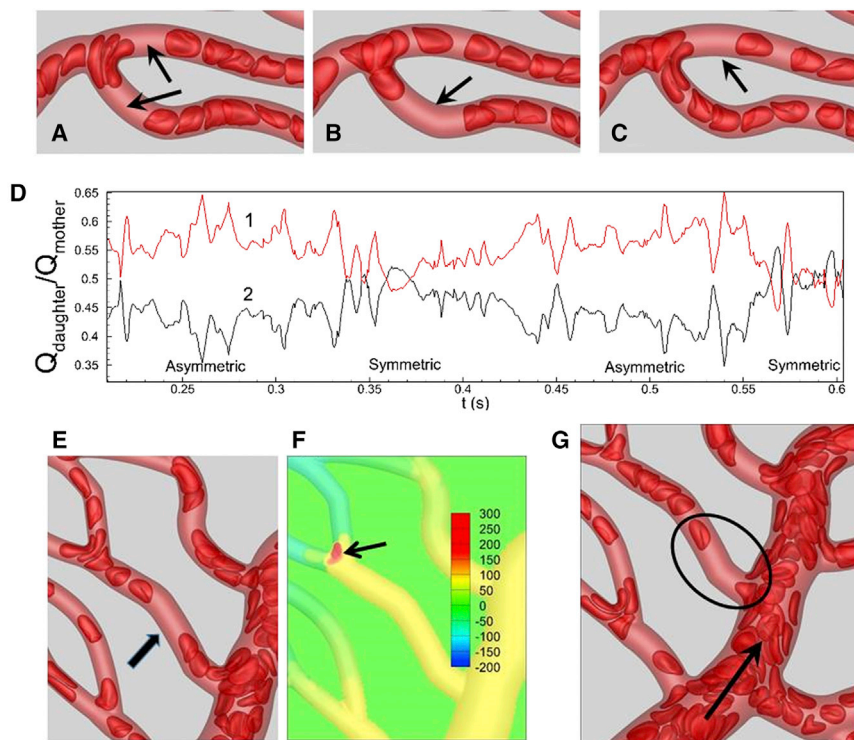

FIGURE 5 (A) Shown here is symmetric lingering. (B and C) Shown here is asymmetric lingering in which daughter vessels are blocked periodically. Arrows indicate formation of voids in RBC trains. (D) Shown here is periodic oscillation in flow rates in daughter vessels in (B) and (C) due to switching from symmetric to asymmetric lingering. The flow rates in two daughter vessels are scaled by that in the mother vessel. (E) Given here is void formation (shown by an arrow) in the mother vessel due to cell lingering at a downstream bifurcation. (F) Given here is pressure distribution in arbitrary units showing increased pressure (arrow) at the bifurcation due to cell lingering. (G) Given here is void formation in capillary vessels that emerge from the same side of an arteriole. The arrow indicates flow direction. To see this figure in color, go online.

observed in the time-dependent flow rate ratios during symmetric and asymmetric lingering events, as shown for two daughter branches in Fig. 5 D.

Cell lingering at bifurcations not only reduces hematocrit in the daughter vessels, it can also reduce hematocrit in the mother vessel by forming voids. This rather unusual event is shown in Fig. 5 E. Cell lingering at the specific bifurcation considered here increases the local pressure, as shown in Fig. 5 F. Consequently, the pressure difference along the mother vessel decreases. Due to the reduced pressure gradient, RBCs from the main feeding arteriole cannot enter the mother vessel, which leads to the formation of a void.

RBC voids, therefore, are the footprints of cell lingering at bifurcations. The significant temporal heterogeneity as noted earlier is a direct consequence of cell lingering, or alternatively, void formation. In general, voids are present in many vessels throughout the networks (Fig. 1, A and B; Figs. S1–S3, and S9), but are not always the result of cell lingering at bifurcations. Another mechanism of void formation is depicted in Fig. 5 G. This mechanism is observed when two capillary vessels emanate from the same side of a larger arteriole. If cells are drawn in to the first capillary, a cell-free layer is formed along that side of the arteriole. If the distance between the two side branches is not large, the cell-free layer persists, resulting in the formation of a void in the second capillary.

The implications of cell lingering and void formation are significant, and are discussed next in terms of the relationships between different hydrodynamic quantities.

### Negative pressure-flow correlation

We first consider the relationship between flow rate ( $Q$ ) and pressure drop per unit length ( $\Delta P'$ ) in each vessel in our networks. For a long, straight vessel, this relationship is expressed in terms of the well-known Poiseuille's law as

$$\Delta P' = R \cdot Q, \quad (5)$$

Where  $R$  is the hydrodynamic resistance per unit length of the vessel. Although valid for long, straight vessels, this relationship is often used in analyzing *in vivo* data, and also in lower-dimensional modeling of microvascular networks, as noted previously. Poiseuille's law implies a positive correlation between pressure drop and flow rate, i.e., an increase in pressure drop results in an increase in flow rate, and vice versa.

Do our direct simulations of microvascular networks also yield positive pressure-flow correlations? To investigate this, we compute the pressure drop-flow rate correlation coefficient  $C_{\Delta P' - Q}$  defined as

$$C_{\Delta P' - Q} = \frac{\langle [\Delta P'(t) - \langle \Delta P' \rangle] \cdot [Q(t) - \langle Q \rangle] \rangle}{\sqrt{\langle [\Delta P'(t) - \langle \Delta P' \rangle]^2 \rangle \cdot \langle [Q(t) - \langle Q \rangle]^2 \rangle}}, \quad (6)$$

where  $\Delta P'(t)$  and  $Q(t)$  are the time-series pressure-drop per unit length and flow-rate data in each vessel, and  $\langle \rangle$  represents a time-averaged quantity. This correlation coefficient is presented in Fig. 6 A. As seen in the figure, for most vessels  $C_{\Delta P' - Q}$  is positive, confirming the validity of Poiseuille's law for capturing the general behavior of blood flow in microvessels. However, it can also be noted that for many vessels, the correlation coefficient is very weak. Most strikingly, for several vessels the coefficient is negative. This implies that, for these vessels, an increase in pressure drop is accompanied by a decrease in flow rate, which is in stark contrast to the positive pressure-flow correlation implied by Poiseuille's law.

The origin of these negative correlations is the RBC lingering phenomenon at vascular bifurcations. Due to cell jamming at a bifurcation, the flow rate into the daughter vessels decreases, while at the same time the pressure at the entrance of the daughter vessel increases, resulting in an increase in pressure drop. A time series of  $\Delta P'(t)$  and  $Q(t)$  for one such vessel is shown in Fig. 6, B and C. It is readily seen here that large increases in  $\Delta P'(t)$  at  $\sim 0.16, 0.3,$  and  $0.4$  s are accompanied by large drops in  $Q(t)$ . As is evident from the behavior in this vessel, the magnitudes of these temporary increases in  $\Delta P'(t)$  and reductions in  $Q(t)$  can be significant, and in vessels where such events occur frequently, a negative pressure-flow correlation results. As noted in Fig. 6 A, large negative correlations are observed in the smallest diameter capillaries, because it is there that the jamming events are most severe. Large negative correlations are also observed in capillary vessels that directly discharge into venules of much larger diameter.

Further insights into the negative  $\Delta P' - Q$  correlation can be obtained by plotting  $\Delta P'$  versus  $Q$  and analyzing the nature of the data scatter. This is shown in Fig. 6 D for a specific vessel, and data points are obtained at 0.0005 s intervals. The magnitude and frequency of the pressure-drop and flow-rate pulses causing the negative correlation are evident here. The lower-right portion of the figure showing a dense clustering of data points suggests that for most of the simulation, a positive correlation exists. On the other hand, the data points associated with the lingering events causing a negative correlation appear in the middle to upper-left of the figure. Whereas the range over which these data points appear is much greater in magnitude, indicating the severity of the lingering events, the reduced density of the data cluster is indicative of the reduced frequency with which they occur.

Additional data on  $\Delta P' - Q$  correlations are given in Fig. S12.

### Temporal spikes in vascular resistance

An important consequence of the negative pressure-flow correlation is significant temporal spikes in vascular

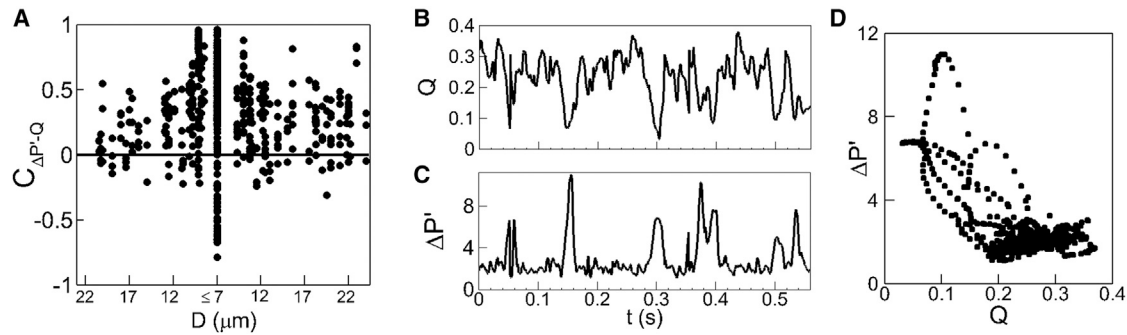

FIGURE 6 (A) Shown here is the pressure-drop flow-rate correlation  $C_{\Delta P'-Q}$  obtained in our network simulations. Each data point represents individual vessels. (B and C) Shown here is a time series of flow rate (in  $\text{m}^3/\text{s} \times 10^{13}$ ) and pressure drop per unit length (in  $\text{Pa}/\mu\text{m}$ ) in a vessel giving a negative pressure-flow correlation. (D) Given here is a scatter plot of  $\Delta P'(t)$  versus  $Q(t)$  for a specific vessel. See text for an explanation.

resistance. Regardless of the correlation behavior, as the flow rate through a vessel decreases the hydrodynamic resistance increases. However, as is clear from Eq. 5, an increase in  $\Delta P'$  corresponding to a decrease in  $Q$  results in a much more significant increase in resistance than in a vessel with a positive  $\Delta P' - Q$  correlation. The time-dependent resistance  $R(t)$  of one vessel is shown in Fig. 7, which shows spikes during which the resistance increases by as much as 50 times the average value. Additional data are in Fig. S13. The source of this significant increase in the vascular resistance is the cell lingering at bifurcations. Because of the cell lingering, the flow rate into the daughter vessel decreases whereas the pressure near the entrance to the daughter vessel increases. Consequently, the pressure drop in the daughter vessel increases. This, together with the decrease in flow rate, results in a large increase in resistance.

### Negative hematocrit-resistance correlation

In microvascular blood flow, and particulate suspension flows in general, the flow resistance increases with

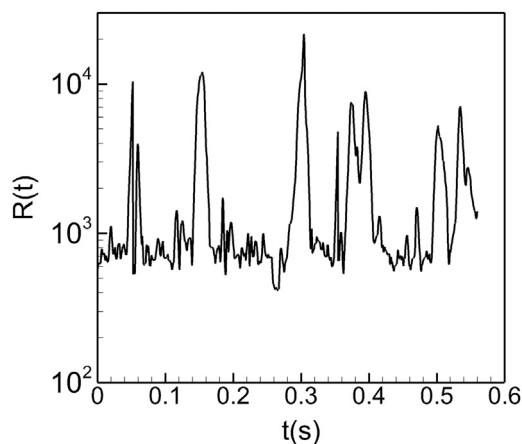

FIGURE 7 Time series of vascular resistance in one vessel showing temporal spikes resulting in a nearly 50-times increase in resistance compared to the mean.

increasing hematocrit, or particulate volume fraction. Thus, in general, a positive correlation exists between the vascular resistance and hematocrit. Indeed, empirical relations exist based on in vivo and in vitro data relating these two quantities (11). To see if our simulated networks yield a positive correlation between the time series of vascular resistance  $R(t)$  and hematocrit  $H_i(t)$ , we compute a hematocrit-resistance correlation coefficient  $C_{R-H_i}$  defined in a similar manner to Eq. 6. This coefficient is plotted in Fig. 8 A for all vessels in the networks. As can be seen in this figure, on average most vessels yield a positive correlation, implying the usual trend that the vascular resistance increases with increasing hematocrit. However, in several vessels the correlation coefficient is either very small or, interestingly, is negative. This reveals a rather unusual phenomenon: in these vessels, resistance increases with decreasing hematocrit, or vice versa.

As with the  $\Delta P' - Q$  correlation, the origin of the negative  $R - H_i$  correlation is the cell lingering at bifurcations. It was noted earlier that the lingering events result in hematocrit and flow-rate reductions in the daughter vessels. At the same time, pressure increases significantly around the bifurcation region, resulting in an increase in the pressure drop in the daughter vessels. Consequently, resistances in these vessels go up despite reductions in hematocrit, resulting in the negative correlation. Fig. 8, B and C, shows one such example for a specific vessel. Here  $H_i(t)$  drops from 0.4 to 0.12 at  $\sim 0.15\text{--}0.16$  s, but  $R(t)$  increases by nearly 50 times, resulting in a large negative correlation during this event. At other times, e.g., around 0.12, 0.14, and 0.18 s,  $H_i(t)$  increases to 0.4, but  $R(t)$  does not show a significant jump, implying that at these times there is also not a strong positive correlation between the two quantities.

Additional data on  $R - H_i$  correlation are given in Fig. S14.

An interesting feature of the negative  $R - H_i$  correlation is that it takes on a different meaning based on the location of the vessel in the network hierarchy. For capillaries or other vessels on the arterial side (i.e., daughter branches or mother branches), the negative correlation implies an increase in



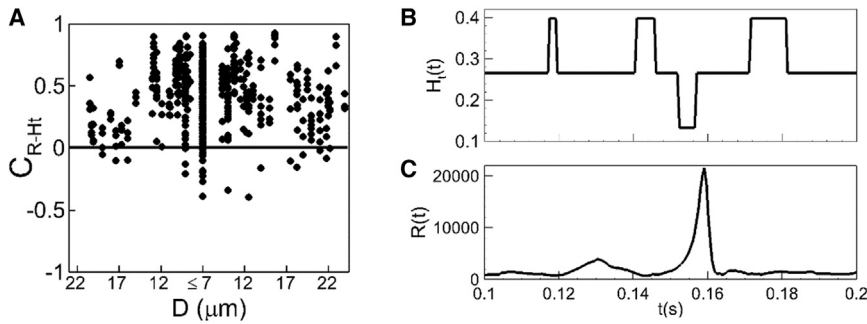

FIGURE 8 (A) Given here is the hematocrit-resistance correlation  $C_{R-H_t}$ . Each data point represents an individual vessel. (B and C) Given here is a time series of hematocrit  $H_t(t)$  and resistance  $R(t)$  in one vessel showing a negative hematocrit-resistance correlation.

resistance accompanied by a decrease in hematocrit. That is, it occurs as a direct result of the RBC void formation due to lingering, as previously discussed. For vessels on the venous side, however, a negative correlation results from an opposite trend: the resistance decreases with increasing hematocrit. This is observed to occur as an indirect result of the RBC void formation due to lingering. Because of this, the behavior is not dominated by the pulses as with the other negative correlations, but rather is observed over longer periods of time.

This latter behavior is observed in venules that are fed by two merging vessels each with distinctly different RBC patterns. For example, if one feeding vessel has a steady flow of RBCs and the other has a very intermittent flow, then this form of negative correlation occurs. A prominent cause of intermittent flow is the RBC voids generated due to lingering at the bifurcation feeding that vessel. As these voids migrate through the capillary and enter the venule into which it merges, this type of negative correlation results. The hydrodynamic explanation behind this is that in the outlet venule the hematocrit increases with an increase in  $Q$  and small change in  $\Delta P'$  (i.e., increase in  $H_t$  with decrease in  $R$ ). The first event in the development of this negative correlation is the formation of a void in the vessel feeding the venule. Following this, the void moves through the capillary and into the venule. Thus there is a volume flow-rate contribution to the discharge venule, without a hematocrit contribution. In the downstream vessel this ultimately results in an increase in volume flow rate with little change in  $\Delta P'$ . Figures are provided in the [Supporting Material](#) that further describe this process (Fig. S15).

## DISCUSSION

We have presented, to our knowledge, the first 3D simulations studying blood flow in microvascular networks that capture both the cellular-scale microphysics and the highly complex physiological architecture. The number of vessels and bifurcations considered, and the network volumes simulated, as well as the amount of time-averaged data obtained are comparable to the typical volume of data utilized with *in vivo* analyses. Whereas time-averaged hemodynamic quantities agree quite well with published *in vivo* data, our

simulations also elucidate cellular-scale events at small timescales that are usually not captured in experiments. To our knowledge, several novel and unexpected phenomena are observed from such time-resolved simulations that are the result of the complex interactions between the RBCs and the vascular geometry.

Prior *in vivo* studies have shown that the distribution of hemodynamic quantities across a microvascular network is heterogeneous; quantities vary across different vessels of similar size (see, e.g., (2,15,30)). The heterogeneity referred to in many of these studies is spatial heterogeneity, as quantities are averaged in time. Similar spatial heterogeneity is observed in our simulations. However, a more severe type of heterogeneity is revealed in our simulations when time-dependent data is considered. We show that within the same vessel, hemodynamic quantities can greatly vary over time. Amplitudes of these temporal variations could be several factors and even orders-of-magnitude higher than the average values. This high degree of temporal heterogeneity is absent in blood flow in straight tubes where fluctuations in hemodynamic quantities occur solely due to cell-cell interactions.

In terms of quantifying heterogeneity in microvascular networks, various *in vivo* works have been performed in which velocities in capillaries were utilized. Considering all of the capillary vessels from each network simulation, the average velocity was  $\sim 0.7$  mm/s. This is generally in agreement with the *in vivo* work of Kleinfeld et al. (31), who measured the average velocities in the neocortical capillaries of a rat to be in the range of 0.5–1.6 mm/s. Similar values have been reported in other *in vivo* works as well (23,32,33). With regard to the time-dependent velocities in all of the capillary vessels from the simulations, these were observed to fluctuate by as much as 2 mm/s, which is also in general agreement with the *in vivo* work of Tomita et al. (34), who found velocities in capillaries to vary by as much as 1.6 mm/s. Various other *in vivo* studies on capillary blood flow have been performed (35–37) in which velocity ranges have been reported to be on the same order as that computed in our simulations.

We show that a major cause of the temporal heterogeneity is the piling-up (i.e., lingering) of RBCs near vessel bifurcations. RBC lingering has been observed in prior *in vivo*

works (e.g., (34,38)), as well as computational works (39). Often, RBC lingering in our simulations occurs in a cyclical manner resulting in a quasi-periodic variation in hemodynamic quantities that is completely independent of the cardiac cycle. We show that lingering can reduce the hematocrit and flow rate not just in the daughter vessels, but also in the mother vessels. Significant transient events are known to occur when considering the flow of whole blood (40,41). Periodic oscillations have been predicted in lower-dimensional theoretical modeling of microvascular networks (14–16), and observed both *in vivo* (12) and in microfluidic networks (13). Specifically, the experimental studies in (12,13) considered whole blood, and Forouzan et al. (13) ascribed such oscillations to capillary blockage by leukocytes. In general, inactivated leukocytes are much stiffer than the RBCs and have a much larger transit time through a capillary vessel (42). Thus, oscillations resulting from leukocyte blocking are likely to have a lower frequency than those resulting from RBC lingering. Forouzan et al. (13) also presented power spectra of time-series data, and found different maxima depending on the presence of RBCs only, or RBCs with leukocytes. Our data also show the maxima to occur at the lower end of the frequency spectrum, with the magnitude of the total power fraction on the same order as in (13). However, the range of frequencies in the two studies is significantly different. Our simulations represent 0.7 s of flow, during which  $\sim 1500$  samples are taken. The range of frequencies obtained in our simulations is on the order of hundreds of Hz. Thus the fluctuations in flow quantities in the capillaries in our simulations, such as flow rate, directly correspond to individual RBC behavior as each passes through an individual bifurcation. In contrast, in (13), measurements are made over a time interval of 5 min with a sampling frequency of 100 Hz, resulting in a frequency range of  $< 1$  Hz. So the fluctuations are more associated with that of either bulk RBC motion, or events that occur over much longer times, such as capillary blockage by white blood cells. Nonetheless, RBC lingering serves as a major cause of microvascular heterogeneity, and is observed throughout our simulations at all bifurcations. Under extreme circumstances it may cause temporary flow stoppage, as also observed in our simulations.

An interesting question concerning the nature of heterogeneity is whether it is a stochastic phenomenon. On the one hand, in a more general sense, heterogeneity can be viewed as deterministic. First, we are able to directly link the RBC lingering events to being the cause of the prominent temporal fluctuations. Second, we are able to link the frequency of these events to vessel size. So in this sense, the degree of heterogeneity is dictated by vessel size, and thus it can be viewed as a deterministic phenomenon. On the other hand, the underlying mechanisms behind each of these time-dependent events that give rise to such heterogeneity, do resemble that of a stochastic phenomenon. The nature of the process that led to the RBCs being in their

particular configuration and the deformed states that caused them to pile-up in a manner resulting in this temporary blockage, can be viewed as stochastic in that all of the subsequent RBC interactions leading up to this are too complex to discern a pattern. Thus, heterogeneity can be considered a stochastic phenomenon if one considers the individual events that comprise the averages in quantities.

Vascular resistance is an important quantity that directly controls the amount of blood flow in specific vessels. Blood viscosity measured *in vivo* was shown to be higher than that measured *in vitro* using long, straight tubes (11,30). Accordingly, the *in vitro* viscosity law would underpredict the network flow resistance. The higher *in vivo* resistance is attributed in part to the presence of the glycocalyx layer on the surface of endothelial cells lining the blood vessels (43). Our simulations provide another mechanism for increased flow resistance in a network. We show that the cell lingering causes large temporal spikes in vascular resistance. In some instances, magnitudes of these spikes are observed to be orders larger than the mean. This result is in agreement with a prior *in vitro* study that reported an order-of-magnitude increase in pressure gradient at a bifurcation while flowing deformable disk-shaped particles (44). The lingering mechanism, therefore, can account for the higher *in vivo* flow resistance.

The cell lingering as observed here may have far-reaching consequences. We show that in several vessels, it results in negative pressure-flow correlations, meaning that an increase in pressure drop is accompanied by a decrease in flow rate, in stark contrast to the positive pressure-flow correlations implied by Poiseuille's law. In a tube flow, the pressure loss is synonymous with the shear stress and the flow rate is synonymous with the rate of strain. The negative correlation then implies that an increase in stress results in an increase in fluid viscosity. Thus, the blood behavior in these vessels resembles that of a shear-thickening fluid as opposed to a shear-thinning fluid.

An important point to note, however, is that the negative pressure-flow correlation happens only over the periods of time when the lingering events occur. Outside of these lingering events, conditions follow the positive pressure-flow correlation. What this suggests is that in vessels with negative correlation coefficients, the average behavior is dominated by the pulses in flow properties resulting from RBC lingering. If the magnitude of these pulses and/or the frequency with which they occur is significant enough, then negative correlation coefficients result. Although events of this nature are observed in all capillary vessels, the severity of these events varies from vessel to vessel.

The pulses in flow properties caused by the cell lingering would also result in similar time-dependent behavior in the wall shear stress. It is known that both the average and time-dependent variations of the wall shear stress affect the endothelial cell response triggering diverse physiological events. Our findings suggest that in a microvascular network the

nature of the time dependence may be dominated by the lingering-induced pulses in the shear stress.

Negative correlations are also found between vascular resistance and hematocrit in several vessels, implying that the flow resistance increases in these vessels whereas hematocrit decreases. This also defies the principle of particulate suspension flow, and is a result of the lingering events that are severe in nature. We observe that the negative resistance-hematocrit correlation serves as a feedback mechanism; cells in the feeding artery can sense the lingering occurring in a downstream bifurcation via the fluid pressure, and be temporarily rerouted avoiding the mother vessel. This autoregulatory function provides a mechanism for efficient distribution of the cells across the network.

Cell lingering is observed to result in the formation of RBC voids in daughter and mother vessels. In prior studies using simple geometry, such as straight tubes, it has been observed that RBCs naturally form clusters and voids purely by cell-cell hydrodynamic interactions (45,46). In fact, in our simulations voids are also observed to form as a result of cell-cell interactions just as they would in a straight tube. However, when this occurs, a positive resistance-hematocrit correlation is observed. The additional interaction with the vascular geometry is also required for a negative correlation to manifest.

As noted before, these anomalous results cannot occur in flow through straight tubes, and they underscore the importance of considering realistic physiological geometry and cellular interactions in modeling microvascular hemodynamics. These anomalies may become even more severe when whole blood is considered due to both RBC lingering and leukocyte blockage (40). Additionally, diseased RBCs are known to have widely different rheological properties, which can also enhance such events. The magnitude and frequency of such events as observed in our simulations warrants further study into the impact of such events on important physiological phenomena, such as the adaptation mechanisms in the microvasculature at the cellular scale, oxygen and nutrient transport, and efficiency of drug delivery.

For this work, we have utilized RBC membrane properties typical of an average, healthy cell. The effects of the cell properties on the network hemodynamics are not considered here. Specifically, our model does not consider membrane viscosity, which has been a subject of interest in some recent works (47,48). In our prior works (28,49) we have shown that the usual value of membrane viscosity does not change the qualitative nature of the RBC deformation; rather, it changes the timescale of transient recovery. Thus, inclusion of membrane viscosity would not alter the occurrence of the phenomena that are observed in our simulations, such as RBC jamming. Of course, in the extreme case of unusually large membrane viscosity, the jamming effect could be very severe.

## CONCLUSIONS

This work presents, to our knowledge, the first direct simulation of 3D cellular-scale blood flow in physiologically realistic microvascular networks. Prediction of time-averaged hemodynamic quantities agree well with published in vivo data. The RBCs are observed to linger at vascular bifurcations resulting in hematocrit and flow reductions in daughter and mother vessels. The cell lingering results in orders-of-magnitude increase in vascular resistance, and thus provides an additional mechanism for increased blood viscosity in vivo as opposed to in vitro. In several vessels, we find negative pressure-flow correlations in stark contrast to Poiseuille's law. We also find negative resistance-hematocrit correlations in some vessels, again defying the principle of particulate suspension flows.

## SUPPORTING MATERIAL

Supporting Materials and Methods, fifteen figures, and four movies are available at [http://www.biophysj.org/biophysj/supplemental/S0006-3495\(17\)31135-9](http://www.biophysj.org/biophysj/supplemental/S0006-3495(17)31135-9).

## AUTHOR CONTRIBUTIONS

All authors equally contributed in designing and performing research, analyzing data, and writing the article.

## ACKNOWLEDGMENTS

Computational resources from National Science Foundation (NSF)'s XSEDE resources at the Texas Advanced Computing Center (TACC) are acknowledged.

The work was supported by grant CBET 1604308 from the National Science Foundation (NSF) and the Peter B. Cherasia Fund from Rutgers.

## REFERENCES

1. Suter, S. P., and R. Skalak. 1993. The history of Poiseuille's law. *Annu. Rev. Fluid Mech.* 25:1–19.
2. Popel, A. S., and P. C. Johnson. 2005. Microcirculation and hemorrheology. *Annu. Rev. Fluid Mech.* 37:43–69.
3. Freund, J. B. 2014. Numerical simulation of flowing blood cells. *Annu. Rev. Fluid Mech.* 46:67–95.
4. Viallat, A., and M. Abkarian. 2014. Red blood cell: from its mechanics to its motion in shear flow. *Int. J. Lab. Hematol.* 36:237–243.
5. Fung, Y. C. 1996. *Biomechanics: Circulation*, 2nd Ed. Springer, Berlin, Germany.
6. Li, Y., Y. Song, ..., R. Wen. 2008. Direct labeling and visualization of blood vessels with lipophilic carbocyanine dye DiI. *Nat. Protoc.* 3:1703–1708.
7. Fukumura, D., D. G. Duda, ..., R. K. Jain. 2010. Tumor microvasculature and microenvironment: novel insights through intravital imaging in pre-clinical models. *Microcirculation.* 17:206–225.
8. Secomb, T. W., R. Hsu, ..., B. M. Coull. 2000. Theoretical simulation of oxygen transport to brain by networks of microvessels: effects of oxygen supply and demand on tissue hypoxia. *Microcirculation.* 7:237–247.

9. Mayerich, D., J. Kwon, ..., Y. Choe. 2011. Fast macro-scale transmission imaging of microvascular networks using KESM. *Biomed. Opt. Express*. 2:2888–2896.
10. Sherwood, J. M., D. Holmes, ..., S. Balabani. 2014. Spatial distributions of red blood cells significantly alter local haemodynamics. *PLoS One*. 9:e100473.
11. Pries, A. R., T. W. Secomb, ..., P. Gaetgens. 1994. Resistance to blood flow in microvessels in vivo. *Circ. Res.* 75:904–915.
12. Kiani, M. F., A. R. Pries, ..., G. R. Cokelet. 1994. Fluctuations in microvascular blood flow parameters caused by hemodynamic mechanisms. *Am. J. Physiol.* 266:H1822–H1828.
13. Forouzan, O., X. Yang, ..., S. S. Shevkopyas. 2012. Spontaneous oscillations of capillary blood flow in artificial microvascular networks. *Microvasc. Res.* 84:123–132.
14. Mollica, F., R. K. Jain, and P. A. Netti. 2003. A model for temporal heterogeneities of tumor blood flow. *Microvasc. Res.* 65:56–60.
15. Davis, J. M., and C. Pozrikidis. 2011. Numerical simulation of unsteady blood flow through capillary networks. *Bull. Math. Biol.* 73:1857–1880.
16. Geddes, J. B., R. T. Carr, ..., F. Wu. 2007. The onset of oscillations in microvascular blood flow. *SIAM J. Appl. Dyn. Syst.* 6:694–727.
17. Fry, B. C., J. Lee, ..., T. W. Secomb. 2012. Estimation of blood flow rates in large microvascular networks. *Microcirculation*. 19:530–538.
18. Sriram, K., M. Intaglietta, and D. M. Tartakovsky. 2014. Hematocrit dispersion in asymmetrically bifurcating vascular networks. *Am. J. Physiol. Heart Circ. Physiol.* 307:H1576–H1586.
19. Balogh, P., and P. Bagchi. 2017. A computational approach to modeling cellular-scale blood flow in complex geometry. *J. Comput. Phys.* 334:280–307.
20. Cassot, F., F. Lauwers, ..., V. Lauwers-Cances. 2006. A novel three-dimensional computer-assisted method for a quantitative study of microvascular networks of the human cerebral cortex. *Microcirculation*. 13:1–18.
21. Zakrzewicz, A., T. W. Secomb, and A. R. Pries. 2002. Angioadaptation: keeping the vascular system in shape. *News Physiol. Sci.* 17:197–201.
22. Benedict, K. F., G. S. Coffin, ..., T. C. Skalak. 2011. Hemodynamic systems analysis of capillary network remodeling during the progression of type 2 diabetes. *Microcirculation*. 18:63–73.
23. Lipowsky, H. H., S. Kovalcheck, and B. W. Zweifach. 1978. The distribution of blood rheological parameters in the microvasculature of cat mesentery. *Circ. Res.* 43:738–749.
24. Geuzaine, C., and J. Remacle. 2009. GMSH: a three-dimensional finite element mesh generator with built-in pre- and post-processing facilities. *Int. J. Numer. Methods Eng.* 79:1309–1331.
25. Skalak, R., A. Tozeren, ..., S. Chien. 1973. Strain energy function of red blood cell membranes. *Biophys. J.* 13:245–264.
26. Zhong-can, O. Y., and W. Helfrich. 1989. Bending energy of vesicle membranes: general expressions for the first, second, and third variation of the shape energy and applications to spheres and cylinders. *Phys. Rev. A Gen. Phys.* 39:5280–5288.
27. Yazdani, A., and P. Bagchi. 2012. Three-dimensional numerical simulation of vesicle dynamics using a front-tracking method. *Phys. Rev. E Stat. Nonlin. Soft Matter Phys.* 85:056308.
28. Yazdani, A., and P. Bagchi. 2013. Influence of membrane viscosity on capsule dynamics in shear flow. *J. Fluid Mech.* 718:569–595.
29. Cordasco, D., and P. Bagchi. 2016. Intermittency and synchronized motion of red blood cell dynamics in shear flow. *J. Fluid Mech.* 759:472–488.
30. Pries, A. R., T. W. Secomb, and P. Gaetgens. 1996. Biophysical aspects of blood flow in the microvasculature. *Cardiovasc. Res.* 32:654–667.
31. Kleinfeld, D., P. P. Mitra, ..., W. Denk. 1998. Fluctuations and stimulus-induced changes in blood flow observed in individual capillaries in layers 2 through 4 of rat neocortex. *Proc. Natl. Acad. Sci. USA.* 95:15741–15746.
32. Jeong, J. H., Y. Sugii, ..., K. Okamoto. 2006. Measurement of RBC deformation and velocity in capillaries in vivo. *Microvasc. Res.* 71:212–217.
33. Santisakultarm, T. P., N. R. Cornelius, ..., C. B. Schaffer. 2012. In vivo two-photon excited fluorescence microscopy reveals cardiac- and respiration-dependent pulsatile blood flow in cortical blood vessels in mice. *Am. J. Physiol. Heart Circ. Physiol.* 302:H1367–H1377.
34. Tomita, M., Y. Tomita, ..., N. Suzuki. 2011. Oscillating neuro-capillary coupling during cortical spreading depression as observed by tracking of FITC-labeled RBCs in single capillaries. *Neuroimage*. 56:1001–1010.
35. Villringer, A., A. Them, ..., U. Dirnagl. 1994. Capillary perfusion of the rat brain cortex. An in vivo confocal microscopy study. *Circ. Res.* 75:55–62.
36. Pawlik, G., A. Rackl, and R. J. Bing. 1981. Quantitative capillary topography and blood flow in the cerebral cortex of cats: an in vivo microscopic study. *Brain Res.* 208:35–58.
37. Chang, B. L., G. Santillan, and R. J. Bing. 1984. Red cell velocity and autoregulation in the cerebral cortex of the cat. *Brain Res.* 308:15–24.
38. Pries, A., and T. Secomb. 2008. Blood flow in microvascular networks. In *Handbook of Physiology: Section 2: The Cardiovascular System, Microcirculation*. R. Tuma, K. Ley, and W. Duran, eds. Academic Press, Cambridge, MA.
39. Barber, J. O., J. P. Alberding, ..., T. W. Secomb. 2008. Simulated two-dimensional red blood cell motion, deformation, and partitioning in microvessel bifurcations. *Ann. Biomed. Eng.* 36:1690–1698.
40. Schmid-Schönbein, G. W., S. Usami, ..., S. Chien. 1980. The interaction of leukocytes and erythrocytes in capillary and postcapillary vessels. *Microvasc. Res.* 19:45–70.
41. Furman, M. B., and W. L. Olbricht. 1985. Unsteady cell distributions in capillary networks. *Biotechnol. Prog.* 1:26–32.
42. Bathe, M., A. Shirai, ..., R. D. Kamm. 2002. Neutrophil transit times through pulmonary capillaries: the effects of capillary geometry and fMLP-stimulation. *Biophys. J.* 83:1917–1933.
43. Pries, A. R., and T. W. Secomb. 2005. Microvascular blood viscosity in vivo and the endothelial surface layer. *Am. J. Physiol. Heart Circ. Physiol.* 289:H2657–H2664.
44. Kiani, M. F., and G. R. Cokelet. 1994. Additional pressure drop at a bifurcation due to the passage of flexible disks in a large scale model. *J. Biomech. Eng.* 116:497–501.
45. McWhirter, J. L., H. Noguchi, and G. Gompper. 2009. Flow-induced clustering and alignment of vesicles and red blood cells in microcapillaries. *Proc. Natl. Acad. Sci. USA.* 106:6039–6043.
46. Tomaiuolo, G., L. Lanotte, ..., S. Guido. 2012. Red blood cell clustering in Poiseuille microcapillary flow. *Phys. Fluids*. 24:051903.
47. Tomaiuolo, G., and S. Guido. 2011. Start-up shape dynamics of red blood cells in microcapillary flow. *Microvasc. Res.* 82:35–41.
48. Prado, G., A. Farutin, ..., L. Bureau. 2015. Viscoelastic transient of confined red blood cells. *Biophys. J.* 108:2126–2136.
49. Cordasco, D., and P. Bagchi. 2017. On the shape memory of red blood cells. *Phys. Fluids*. 29:041901.

**Biophysical Journal, Volume 113**

**Supplemental Information**

**Direct Numerical Simulation of Cellular-Scale Blood Flow in 3D Micro-vascular Networks**

**Peter Balogh and Prosenjit Bagchi**

## **Supporting Information**

### **Direct numerical simulation of cellular-scale blood flow in 3D microvascular networks**

PETER BALOGH and PROSENJIT BAGCHI

#### **Video files**

**Movie M1:** Simulation of red blood cells flowing in the microvascular network shown in fig 1A in main article.

**Movie M2:** Simulation of red blood cells flowing in the microvascular network shown in fig. 1B in main article.

**Movie M3:** Close-up showing cell lingering near three bifurcations. The one at the top bifurcation causes temporary flow stoppage in the daughter vessels.

**Movie M4:** Close-up showing cell lingering near two bifurcations. The one on the right causes temporary flow stoppage in the daughter vessels.

#### **Additional images of microvascular networks simulated**

Additional images and an additional network simulated are presented in figs. S1-S3.

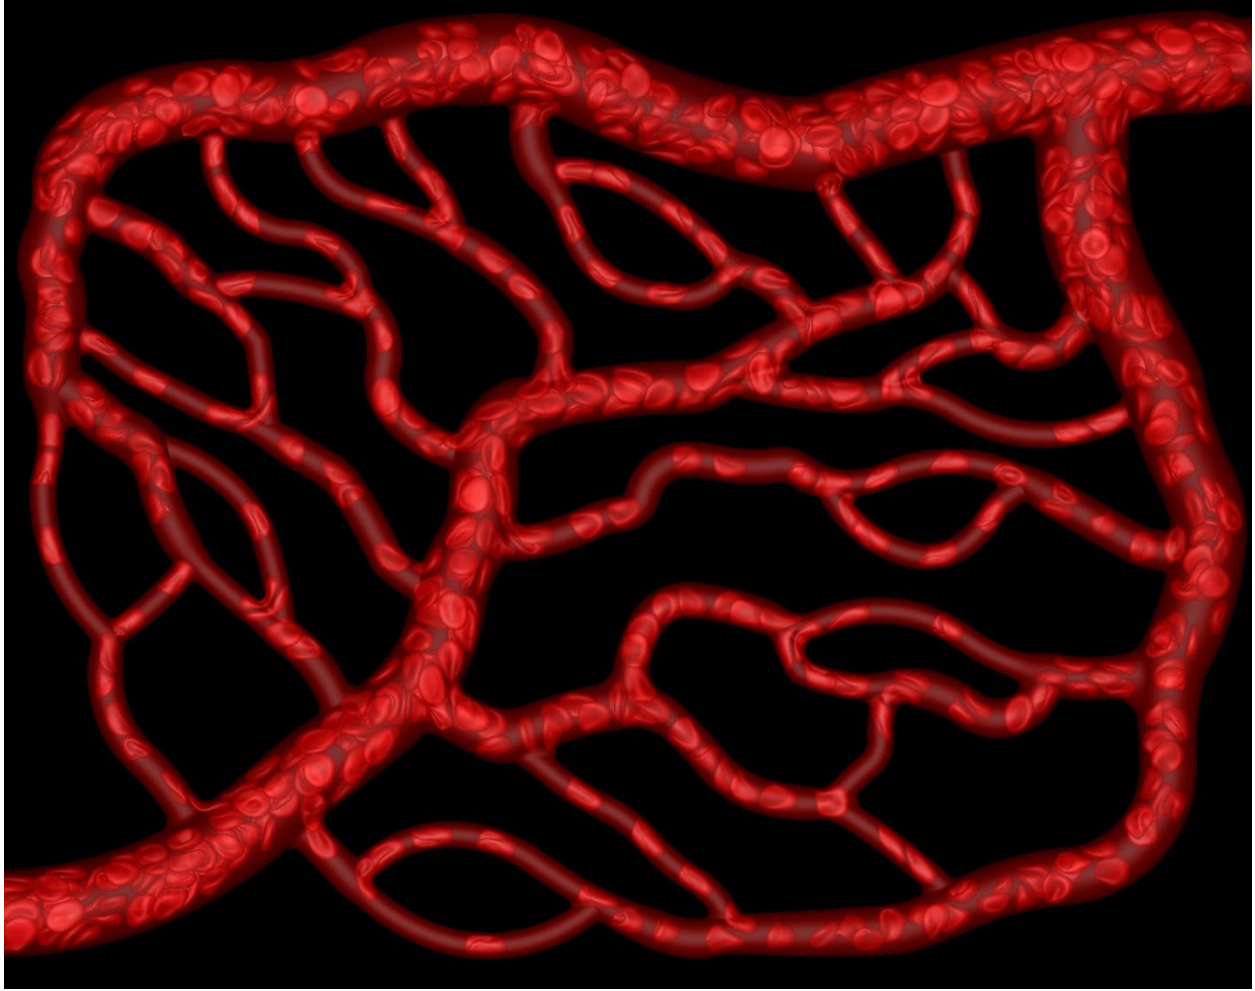

Figure S1: Additional snapshot of microvascular network shown in fig. 1A in main article.

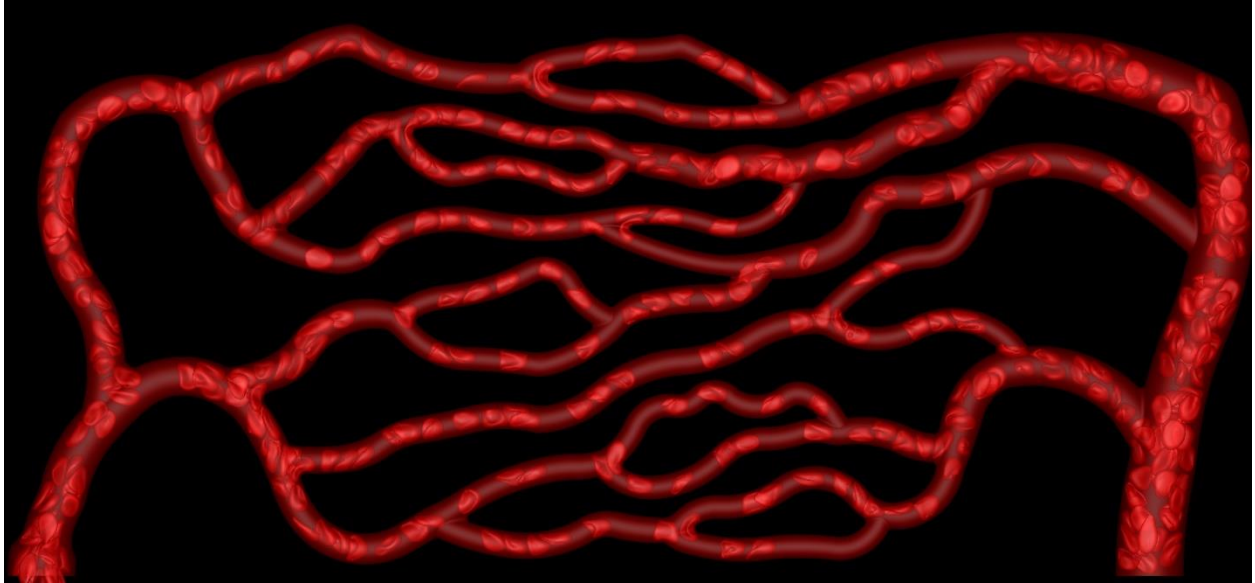

Figure S2: Additional snapshot of microvascular network shown in fig. 1B in main article.

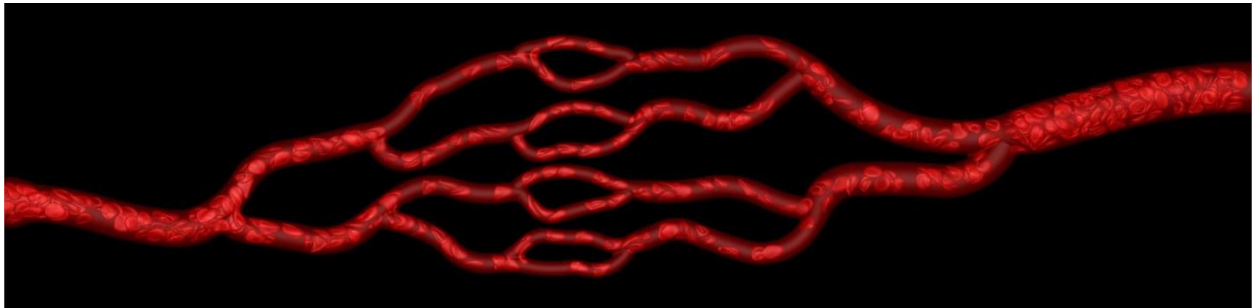

Figure S3: Additional (third) network simulated. Dimensions: 535  $\mu\text{m}$  x 106  $\mu\text{m}$  x 24  $\mu\text{m}$ . Flow is from left to right.

### **Microvascular Network Design**

In designing each of the three microvascular networks, Horton's Law was utilized to determine the relationships between vessel diameters at bifurcations and mergers. This law is defined as

$$\frac{D_n}{D_{n-1}} = 10^b \quad (\text{S1})$$

and a topology following this law is fractal in nature (1). The empirical constant  $b$  is taken as 0.1582,  $D$  is the vessel diameter, and the subscript  $n$  corresponds to the vessel order in the Strahler ordering system (1). For  $b=0.1582$  the diameter ratio is approximately 1.43, however no distinction is made between the



arterial and venous sides of the network in Ref. (1). Since vessels of order  $n$  on the venous side are usually larger in diameter than their counterparts on the arterial side, we take this into account by using

$$\left. \frac{D_n}{D_{n-1}} \right|_{arterial} \approx 1.2 \quad \left. \frac{D_n}{D_{n-1}} \right|_{venous} \approx 1.5 \quad (S2)$$

Within the Strahler ordering system the numbering begins at the capillaries, which are taken to be order 0. As the hierarchy proceeds upstream and downstream of these vessels, the order number increases to  $n+1$  when two vessels of the same order connect with each other. In many instances, connecting vessels are of the same order but have different diameters. In such cases an averaging is used in conjunction with the above diameter ratios to determine the appropriate vessel size. A similar approach is taken when connecting vessels are of a different order.

For the present work we did not investigate the effect of the ‘b’ exponent. The values of ‘b’ we used are average, not extreme values within the physiological range. As such, our networks are representative of ‘average’ physiological microvascular networks.

Our results are related in a more general way to the topology of the network, rather than being related to the geometry of a very specific type of network. That is, these results are not intended to be representative of what would be found, for example, only in a capillary network in the kidney of a rat. Rather, our conclusions and observations represent commonalities associated with general microvascular network topology, and offer insight in a more general way into the hemodynamic mechanisms present in cellular-scale network blood flow.

Different values of ‘b’ would result in networks with different diameter ratios between the mother and daughter branches of bifurcations. However, we do not feel that any of our conclusions or general observations would be different, barring drastic changes to this ‘b’ exponent representative of that beyond the physiological range, or of geometric anomalies in microvascular architecture. In light of this, an investigation into the effects of ‘b’ could be of interest. However, a significant computational undertaking would be required to properly study this issue, which is beyond the scope of this manuscript.

## **Numerical Methodology**

The salient features of the numerical methodology relative to the present simulations are provided below. Additional details and validations can be found in (2). A schematic depicting various components associated with the numerical methodology is provided in Figure S4.

The underlying governing equations are the unsteady Stokes equations for a variable viscosity, constant density fluid, along with the conservation of mass:

$$\rho \frac{\partial \mathbf{u}}{\partial t} = -\nabla p + \nabla \cdot \mu [\nabla \mathbf{u} + \nabla \mathbf{u}^T] + \mathbf{F} \quad (\text{S3})$$

$$\nabla \cdot \mathbf{u} = 0 \quad (\text{S4})$$

All interfaces are immersed into one computational domain that is discretized using a fixed, uniform, Cartesian Eulerian mesh. The governing equations are solved on this mesh using a projection method for the time integration and a staggered arrangement of variables in space. The presence of the complex vascular walls is simulated directly on this mesh by enforcing specific constraints on the Eulerian variables. The deformable interfaces are simulated on a separate Lagrangian mesh fixed to each cell (fig. S4-B), with information transferred to and from the main Eulerian grid using the front-tracking method.

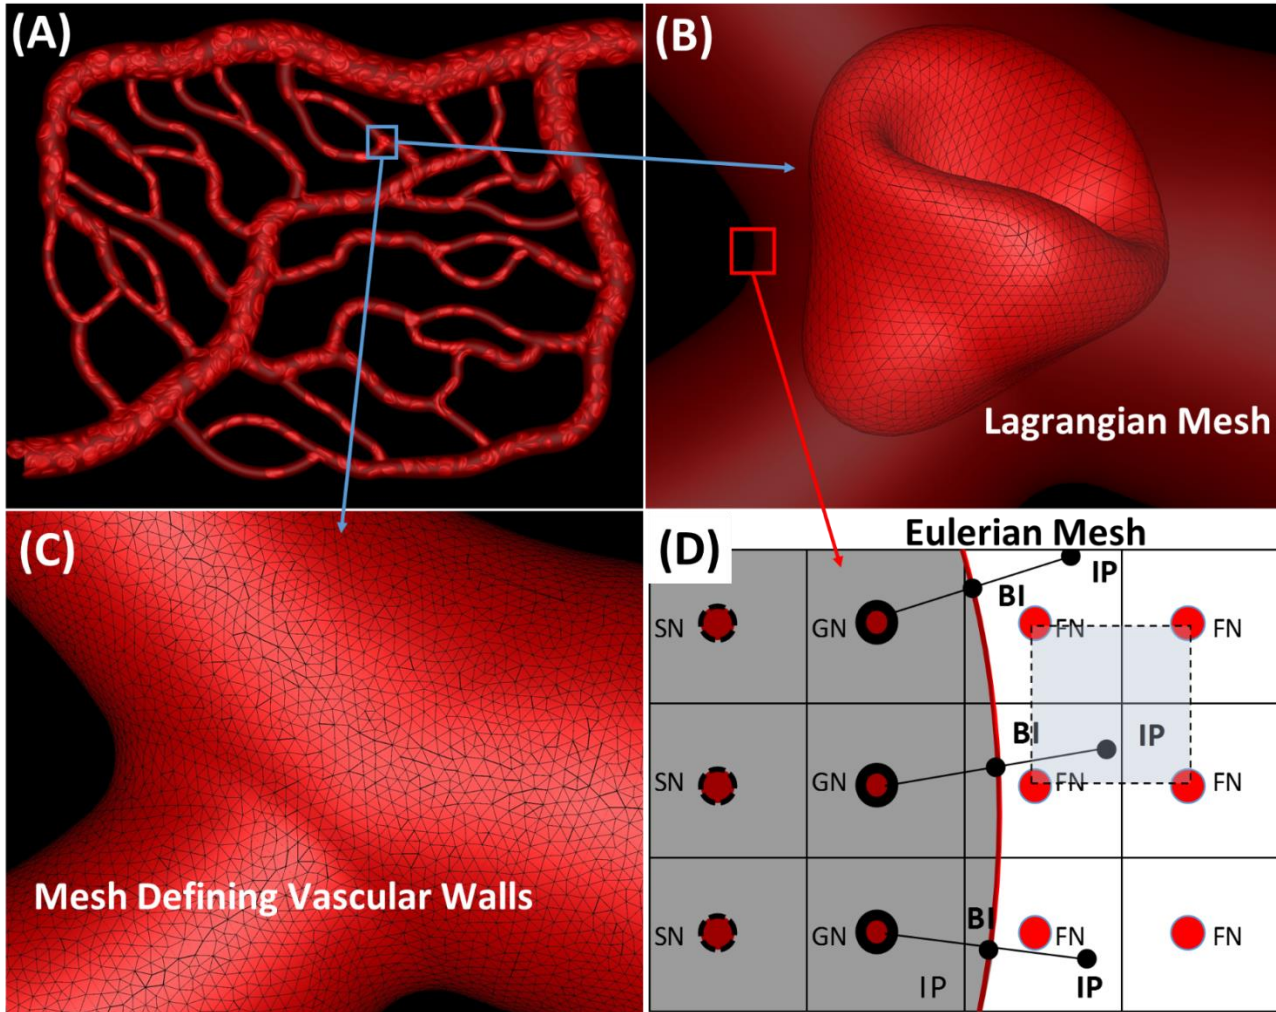

Figure S4: Schematic depicting various simulation components

- (a.) Microvascular network simulation
- (b.) Lagrangian mesh on which finite element computations are performed for RBC deformation
- (c.) Mesh generated on surface of vascular network defining vessels walls when solving the governing fluid flow equations
- (d.) Eulerian mesh on which the governing equations are solved. Eulerian mesh nodes are identified as Solid Nodes (SN), Ghost Nodes (GN), and Fluid Nodes (FN). Additional points utilized with the ghost node method are identified as Boundary Intercept (BI) and Image Points (IP).

For the deformable interfaces, the membrane of each RBC is discretized using Delaunay triangles (Figure S4-B), and the finite element method (FEM) is used to compute the stresses generated in the membrane resulting from shear deformation and area dilatation. In addition to this, the cell membrane also exerts a resistance against bending. Thus, the net membrane force ( $\mathbf{f}_m$ ) is given by:

$$\mathbf{f}_m = \mathbf{f}_e + \mathbf{f}_b \quad (\text{S5})$$

where  $\mathbf{f}_e$  is the elastic tension at each vertex computed from the FEM and  $\mathbf{f}_b$  is the bending force density. The means by which  $\mathbf{f}_e$  and  $\mathbf{f}_b$  are determined are now described.

For the FEM, the elements defined by the Delaunay triangles comprise the Lagrangian mesh, and each vertex (or node) is shared by five or six triangles. The cell shape and location is updated by advecting these nodes. At each node we compute the elastic force,  $\mathbf{f}_e$ , resulting from the membrane resistance against shearing deformation and area dilatation using:

$$\mathbf{f}_e = \sum_n \int_{S_n} \frac{\partial \mathbf{N}}{\partial \mathbf{X}} \cdot \mathbf{P} dS \quad (\text{S6})$$

where  $\mathbf{N}$  is a vector of shape functions,  $\mathbf{P} = \varepsilon_1 \varepsilon_2 \boldsymbol{\tau} \cdot \mathbf{F}^{-T}$  is the first Piola-Kirchhoff stress tensor,  $\mathbf{X}$  is the original configuration of the membrane, and  $S_n$  is the area of each of the  $n$  triangles surrounding the node. To determine the shape functions ( $N_i$ ), the displacement field  $\mathbf{v}$  is expressed as  $\mathbf{v} = N_i \mathbf{v}_i$ , where the index  $i = 0, 1, 2$  denotes the vertices of each triangle. Thus a linear variation of the displacement field is assumed within each element, and the shape functions are determined from the vertex coordinates. To determine  $\mathbf{P}$ , we need to determine the principle stretch ratios  $\varepsilon_1$  and  $\varepsilon_2$ , the principle stresses  $\tau_1$  and  $\tau_2$  comprising the stress tensor  $\boldsymbol{\tau}$  in each element, and the deformation gradient  $\mathbf{F}$ .  $\varepsilon_1^2$  and  $\varepsilon_2^2$  are the eigenvalues of  $\mathbf{F} \cdot \mathbf{F}^T$ , so we first determine  $\mathbf{F}$ , defined as  $\mathbf{F} = \partial \mathbf{x} / \partial \mathbf{X}$ , from the vertex coordinates, where  $\mathbf{x}$  is the current configuration of the membrane. Once we have  $\varepsilon_1$  and  $\varepsilon_2$  we can determine the principle elastic tensions (or stresses) in the cell membrane as:

$$\tau_1 = \frac{1}{\varepsilon_2} \frac{\partial W_s}{\partial \varepsilon_1}, \quad \tau_2 = \frac{1}{\varepsilon_1} \frac{\partial W_s}{\partial \varepsilon_2} \quad (\text{S7})$$

Where  $W_s$  is the strain energy function of the membrane material. In this work we use the constitutive relation for  $W_s$  based on the work of Skalak et. al (3)

$$W_s = \frac{G_s}{4} [(I_1^2 + 2I_1 - 2I_2) + CI_2^2] \quad (\text{S8})$$

Here  $G_s \sim 2-5 \times 10^{-6}$  N/m is the membrane shear elastic modulus,  $CG_s$  is the area dilation modulus, and

$I_1 = \varepsilon_1^2 + \varepsilon_2^2 - 2$  and  $I_2 = \varepsilon_1^2 \varepsilon_2^2 - 1$  are the strain invariants of the Green strain tensor defined as

$\mathbf{E} = (\mathbf{F}^T \cdot \mathbf{F} - \mathbf{I})$ . For an RBC, the shearing deformation can be significant, but the surface area dilation

is almost negligible. The parameter  $C$  is used to control the amount of surface area dilation, and a large value results in a small area dilation. Using each of these relations, the elastic force  $\mathbf{f}_e$  is then computed at each node from Eq. S6. Additional details on the FEM are given in our prior work (4).

For the membrane resistance against bending, this is modeled following Helfrich's formulation for a bending energy, expressed as:

$$W_b = \frac{E_b}{2} \int_S (2\kappa - c_0)^2 dS \quad (S9)$$

where  $E_b \sim 2.7 \times 10^{-19}$  J is the bending modulus,  $\kappa$  is the mean curvature,  $c_0$  is the spontaneous curvature, and  $S$  is the entire surface area of a cell (5). To evaluate the force density from this integral we use the following form, which can be derived from Eq. S9:

$$\mathbf{f}_b = E_b \left[ (2\kappa + c_0)(2\kappa^2 - 2\kappa_g - c_0\kappa) + 2\Delta_{LB}\kappa \right] \mathbf{n} \quad (S10)$$

where  $\kappa_g$  is the Gaussian curvature,  $\Delta_{LB}$  is the Laplace-Beltrami operator, and  $\mathbf{n}$  is the normal vector. To evaluate the mean and Gaussian curvature at each node, a quadric surface is fitted to the node and its nearest neighbors.  $\Delta_{LB}\kappa$  is then approximated on a small surface patch  $dS$  using the Gauss theorem, as  $(1/dS) \int_l \nabla_S \kappa \cdot \mathbf{n}_l dl$  where  $l$  denotes the patch boundary,  $dS$  the surface gradient, and  $\mathbf{n}_l$  the unit normal to the boundary  $l$ . The gradient  $dS$  on a surface triangle can be obtained either by a linear interpolation of the surface and  $\kappa$ , or using the loop subdivision method. Further details on numerical computation of the bending force density are given in Ref. (6).

The resulting membrane forces computed from Eq. S5 are then coupled to the governing equations using the front-tracking method via the body force term,  $\mathbf{F}$ , in Eq. S3, defined as:

$$\mathbf{F} = \int_S \mathbf{f}_m \delta(\mathbf{x} - \mathbf{x}') d\mathbf{x}' \quad (S11)$$

where  $\delta$  is the three-dimension Dirac-delta function used to spread this singular force over a finite span of the surrounding fluid, and  $\mathbf{x}$  and  $\mathbf{x}'$  are the locations in the flow domain and on the cell surface  $S$ , respectively. We numerically approximate the delta function with a cosine function spanning four grid points around the cell boundary:

$$\delta(\mathbf{x} - \mathbf{x}') = \frac{1}{64\Delta^3} \prod_{i=1}^3 \left[ 1 + \cos \frac{\pi}{2\Delta} (x_i - x_i') \right] \quad (S12)$$

where  $\Delta$  is the Eulerian grid size.

We now describe the means by which the viscosity contrast between the hemoglobin and the plasma is modeled. The underlying structure of the numerical approach permits multiple fluids to be modeled within one computational framework. Mathematically the distinction is made between the separate fluids by means of an indicator function,  $I(\mathbf{x}, t)$ , which is zero outside a cell and one inside. This function is used to evolve the viscosity field  $\mu(\mathbf{x}, t)$  as the deformable cells change shape and acquire new locations.  $\mu(\mathbf{x}, t)$  written in terms of this indicator function is:

$$\mu(\mathbf{x}, t) = \mu_p + (\mu_c - \mu_p)I(\mathbf{x}, t) \quad (\text{S13})$$

where  $\mu_p$  and  $\mu_c$  are the viscosities of the plasma and cytoplasmic fluids, respectively. It can be shown that the indicator function follows a Poisson equation as:

$$\nabla^2 I = \nabla \cdot \mathbf{G} \quad (\text{S14})$$

where  $\mathbf{G}(\mathbf{x}, t)$  is an Eulerian variable constructed from the cell surface normal  $\mathbf{n}$  as:

$$\mathbf{G}(\mathbf{x}, t) = \int_S \delta(\mathbf{x} - \mathbf{x}') \mathbf{n} dS \quad (\text{S15})$$

Equation S15 is solved to obtain  $I$  at each time step and update  $\mu(\mathbf{x}, t)$ .

For the complex vascular network walls, the network geometry is first constructed using a standard CAD software in conjunction with *in vivo* image data. A mesh is then generated on the surface (Figure S4-C), which is used to define the vascular boundaries in discrete space. Constraints are enforced at the Eulerian grid points immediately exterior to the interface defined by this mesh (i.e. points identified as “ghost nodes”) such that a no-slip condition is achieved at the interface. These are formulated as follows (see Figure S4-D). Once the boundaries of the interface have been defined, the Eulerian nodes inside and outside the fluid domain are identified and labeled as fluid nodes (FN) and solid nodes (SN), respectively. The SNs that have at least one neighboring fluid node are identified as ghost nodes (GN). After the GNs have been identified, the boundary-intercept (BI) point for each ghost node is determined by locating the nearest point on the vascular wall. Following this, the image-points (IP) are determined for each GN, which are defined as the mirror image of the respective GN in the fluid domain, across the BI.

The constraints are enforced explicitly at each GN, and are formulated such that a known boundary condition  $\mathbf{u}_{BI}$  is achieved at the BI. The value at the BI is taken to be the average of values at the GN and the IP. In general, the IPs do not coincide with the Eulerian nodes. A standard trilinear interpolant is used to obtain the velocity at the IP from the surrounding Eulerian nodes, and thus the constraint enforced on the velocity becomes:

$$\mathbf{u}_{GN} = 2\mathbf{u}_{BI} - \sum_{m=1}^8 \beta_m \mathbf{u}_m \quad (S16)$$

where  $\beta_m$  are the weighting coefficients for the interpolation. This interpolation scheme results in a second-order accurate velocity field (2).

## **ADDITIONAL DATA on RESULTS**

### **Comparison of predicted RBC shapes with experimental images**

A wide variety of RBC shapes is observed in the simulations as the cells traverse the networks and undergo significant deformation. A few representative examples are provided in fig. S5, along with images from the experimental work (7).

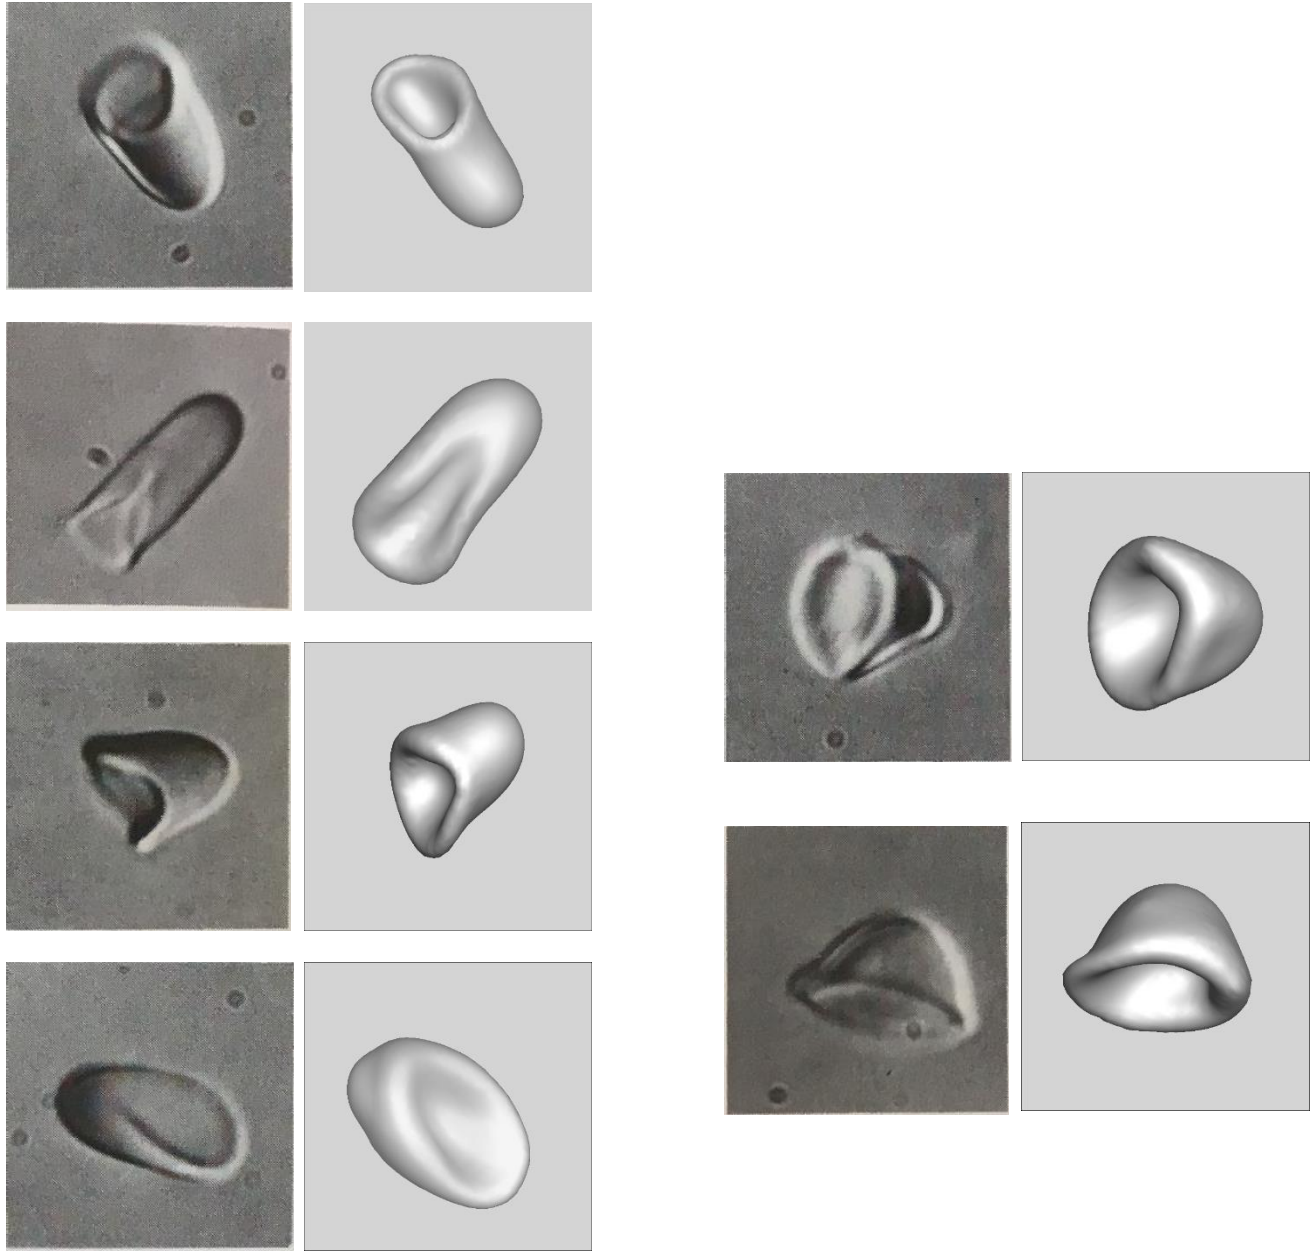

Figure S5: Comparison of various observed RBC shapes in the simulations with the experimental images of (7). For each comparison, the simulation image is on the right.

#### **Additional comparisons with *In Vivo* data**

The figures below provide additional quantitative comparisons between results obtained from our simulations and the *in vivo* data of (8). Specifically we compare the time averaged pressure drop per length ( $\Delta P'$ ), wall shear stress ( $\tau_w$ ), and blood viscosity ( $\mu$ ) in Figure S6-A:C. The wall shear stress and viscosity are determined in an averaged sense, as in (8):



$$\tau_w = \frac{\Delta P' \cdot D}{4}$$

$$\mu = \frac{\Delta P' \cdot D^2}{\bar{V}}$$

where  $D$  is the vessel diameter and  $\bar{V}$  is the bulk fluid velocity.

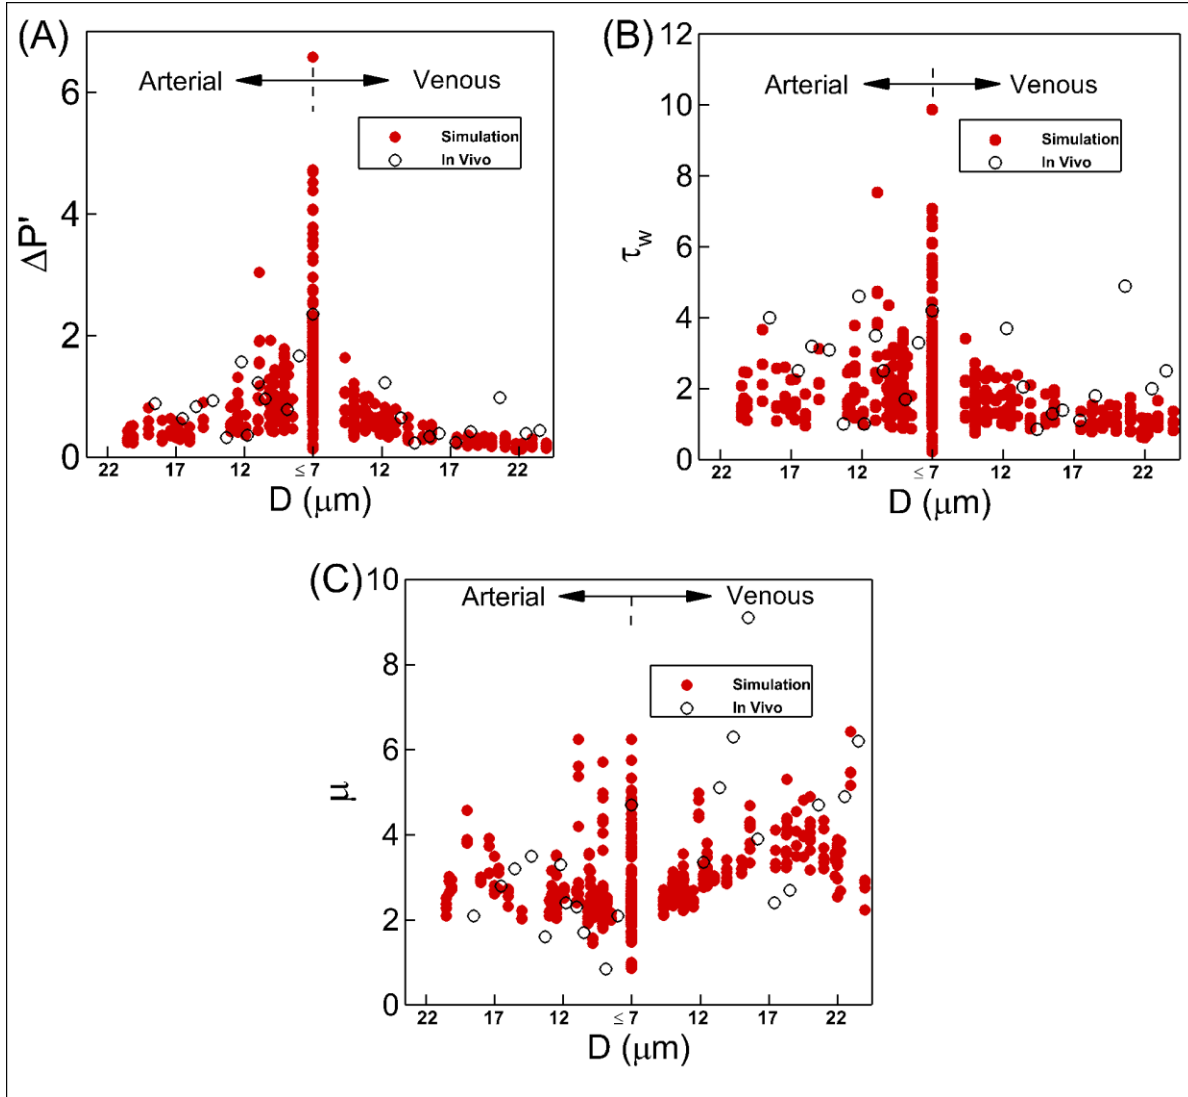

Figure S6 : Additional comparisons between simulation (red, filled circles) results and *in vivo* data (open black circles). (A)  $\Delta P'$ , Pa /  $\mu\text{m}$ ; (B)  $\tau_w$ , Pa ; (C)  $\mu$ , cP

### Spatial heterogeneity in flow rate

As a further demonstration of the spatial heterogeneity observed in our simulations, Figure S7 depicts the time-averaged flow rates as a function of vessel diameter.

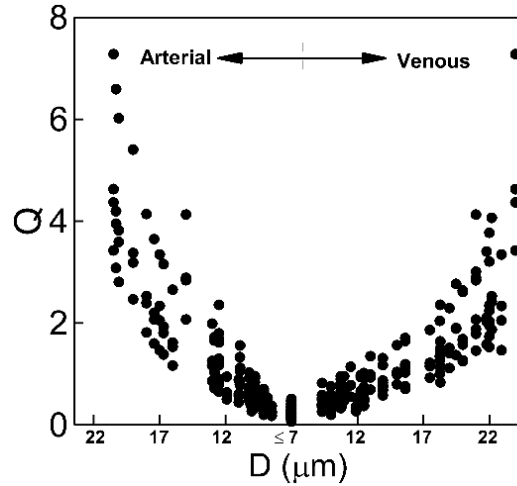

Figure S7: Arterio-venous distribution of time-averaged flow rates,  $Q$ , in  $\text{m}^3/\text{sec} \times 10^{13}$

### Additional data on temporal heterogeneity

Examples of fluctuations in pressure drop per length and flow rate are provided in Figure S8 for a representative vessel. Similar to the hematocrit and resistance in the main article, to quantify the degree of temporal heterogeneity in these quantities, the amplitude of fluctuation is determined for each. The distributions of these amplitudes are plotted in Figure S8-C:D scaled by the mean value for each individual vessel.

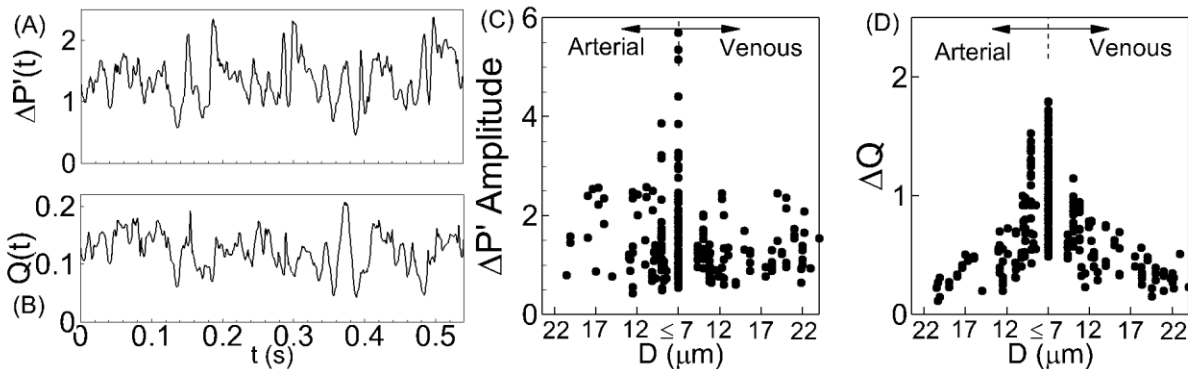

Figure S8. Temporal heterogeneity. A, B: Time history of pressure drop per length  $\Delta P'(t)$  (in  $\text{Pa}/\mu\text{m}$ ) and flow rate  $Q(t)$  (in  $\text{m}^3/\text{sec} \times 10^{13}$ ) in one vessel in the network shown in fig. 1A in the main text. C, D: Amplitudes of temporal oscillations in  $\Delta P'$  and  $Q$  in each vessel, scaled by the mean value for the respective vessel.

### Additional data on RBC lingering

As mentioned in the main article, the RBC lingering phenomena is prominent. While it can be observed at all vascular bifurcations, the frequency is highest at the capillaries and decreases with decreasing vessel diameter. Additional images depicting lingering events at capillary bifurcations are provided in Figure S9, while lingering events occurring at bifurcations associated with larger vessels are provided in Figure S10.

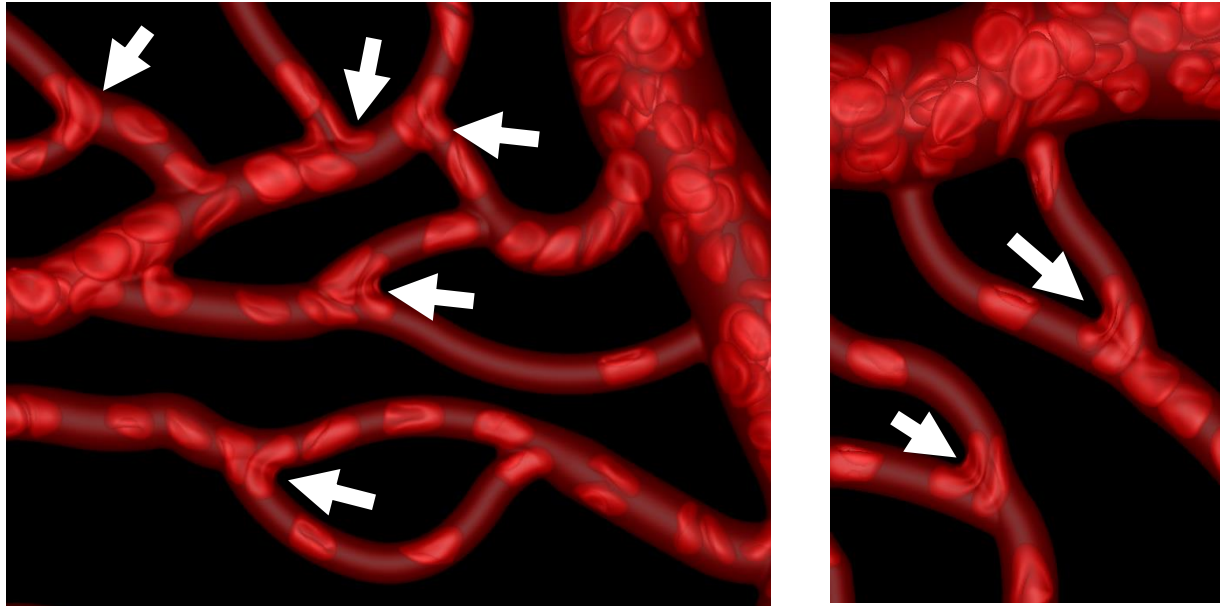

Figure S9: Additional examples of RBC lingering occurring at capillary bifurcations. Arrows are used to show the lingering.

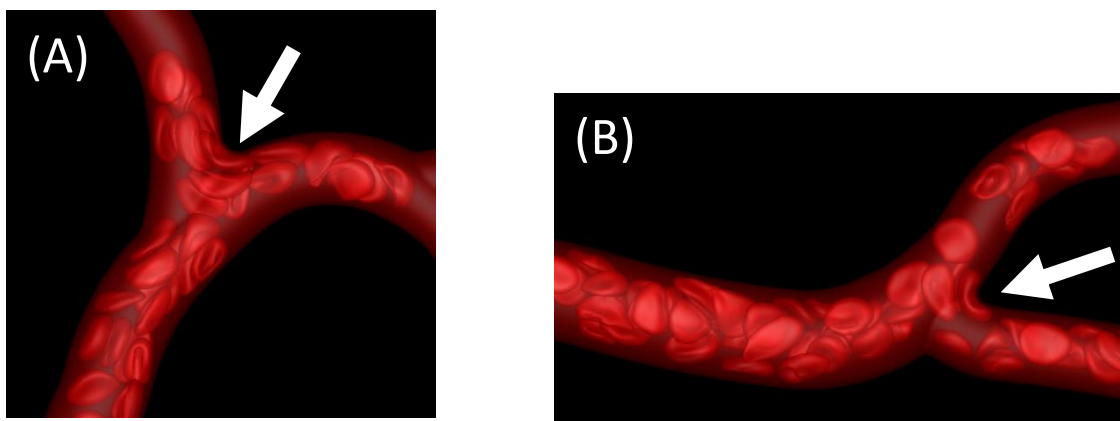

Figure S10: Examples of lingering events occurring at bifurcations associated with larger sized vessels. (A) mother vessel with  $14\mu\text{m}$  diameter and daughter vessels with  $11.5\mu\text{m}$  diameters; (B) mother vessel with  $16\mu\text{m}$  diameter and daughter vessels with  $12\mu\text{m}$  diameters.

### Severe lingering events nearly stopping the flow in affected branches

During the most extreme events, lingering is observed to be so severe that it can nearly stop the flow in the affected branches. Examples of such events are provided in [movies M3-M4](#).

Fig. S11 shows that upon such a severe lingering event (corresponding to video M3) the flow rates in the daughter vessels at about 0.23 s nearly become zero.

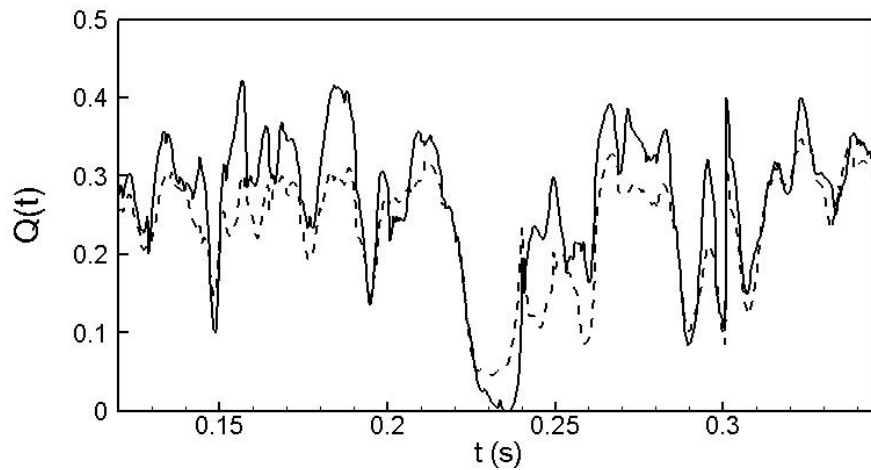

Fig. S11: Time series of flow rates in daughter branches upon a severe lingering at a bifurcation. Flow rates drop to nearly zero at about 0.23 s.

**Additional examples of vessels with negative pressure-flow correlations**

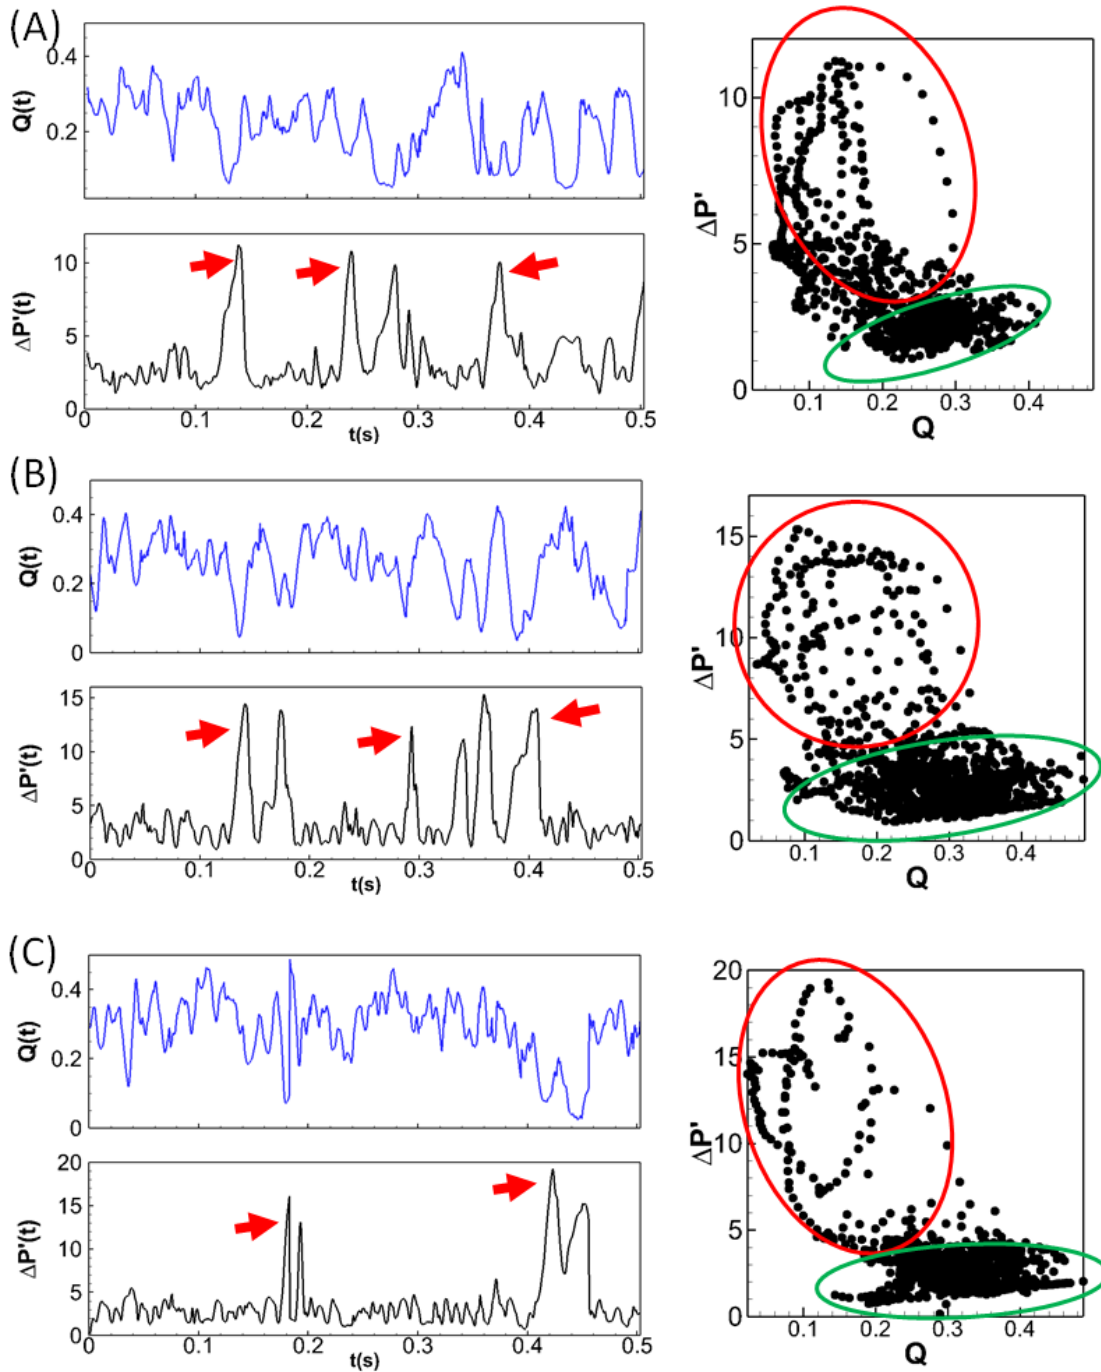

Figure S12. A-C: Additional examples of vessels with negative  $\Delta P'$ - $Q$  correlations. For each vessel, the time series of  $Q$  ( $\text{m}^3/\text{s} \times 10^{13}$ ) and  $\Delta P'$  ( $\text{Pa}/\mu\text{m}$ ) are plotted on the left. Red arrows indicate temporal increases in  $\Delta P'$  corresponding to decreases in  $Q$ . On the right, for each vessel, data scatter of  $Q$  vs.  $\Delta P'$  is provided. Red circles indicate data points corresponding to negative correlations, while the green circles indicate data points corresponding to positive correlations.

As discussed in the main text and shown in Figure 6A there, the lingering phenomena causes vessels to experience temporary sharp increases in  $\Delta P'$  with corresponding decreases in Q. Examples from additional vessels illustrating this behavior are provided in Figure S12:A-C.

### **Additional examples of temporal “Spikes” in resistance**

To further illustrate the consequence of the negative  $\Delta P'$ -Q correlations where temporal “spikes” occur in the hydrodynamic resistance, examples from additional vessels showing these “spikes” are provided in Figure S13 A-C.

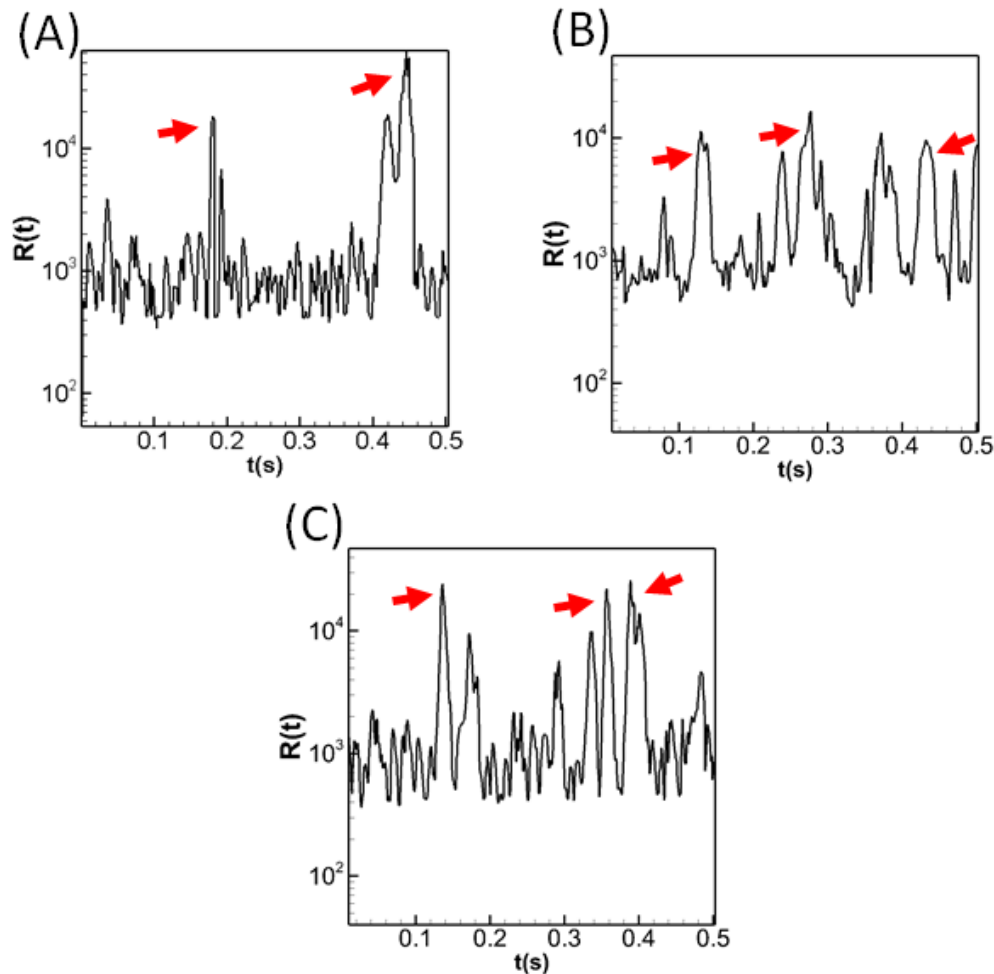

Figure S13. A-C: Additional examples of temporal spikes in hydrodynamic resistance as a consequence of the negative  $\Delta P'$ -Q correlations. For each vessel,  $R$  ( $\text{Pa}/(\text{m}^3/\text{s})/\mu\text{m} \times 10^{-11}$ ) is plotted vs. time. Red arrows draw attention to examples of “spikes” caused by lingering.

### Additional examples of weak and negative resistance-hematocrit correlations

Figure S14. A-C below provides additional examples illustrating the relationship between  $R$  and  $H_t$  in different vessels.

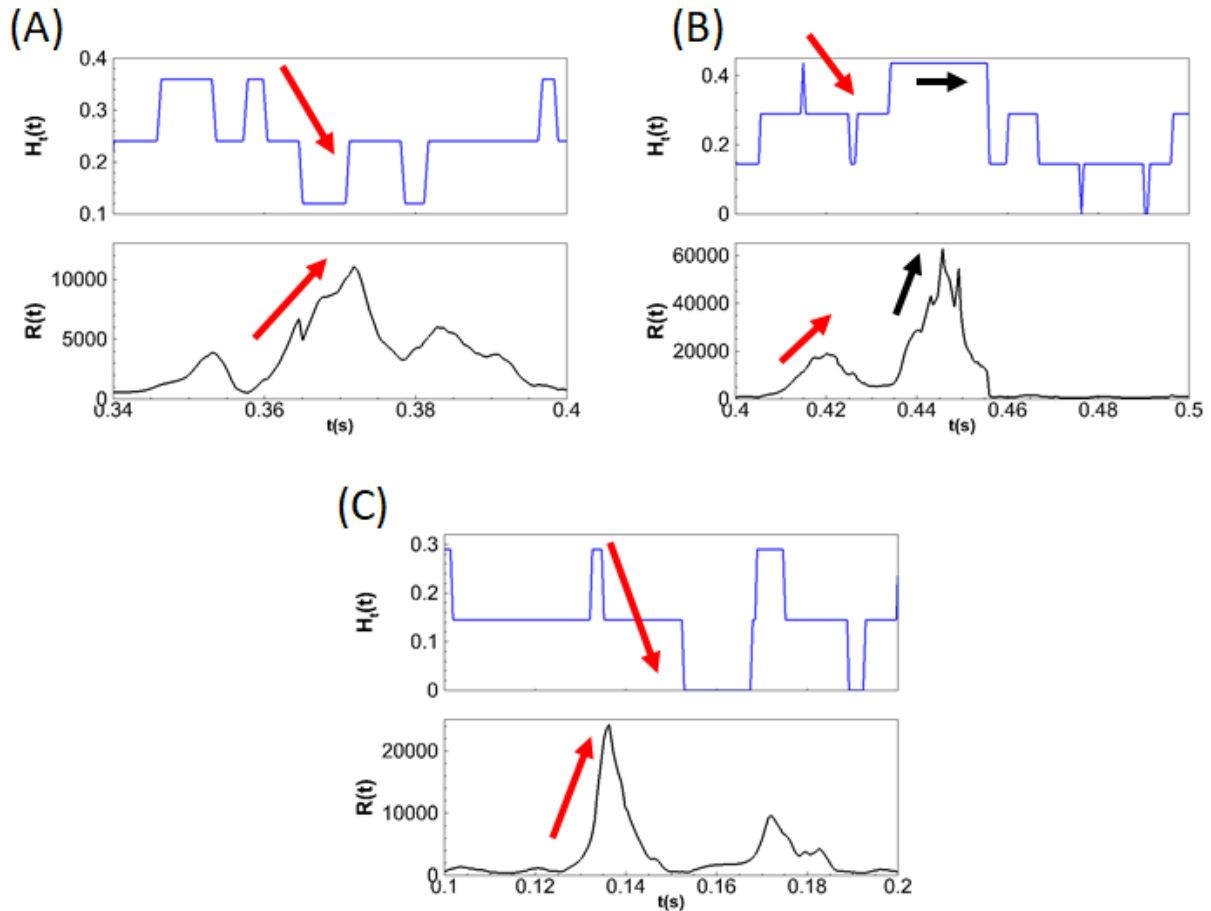

Figure S14. A-C: Time series of resistance ( $\text{Pa}/(\text{m}^3/\text{s})/\mu\text{m} \times 10^{-11}$ ) and hematocrit in three different vessels to further illustrate the relationship between the two quantities. Red arrows denote times of negative correlations. Black arrows indicate times of weak positive correlations.

### Additional information on increase in vessel hematocrit with a decrease in resistance

Here we further describe the process by which the hematocrit in a vessel on the venular side can increase but the resistance can decrease. As mentioned in the main article, a void is first formed in a capillary as a result of lingering. It then traverses the capillary and enters the outlet venule (Figure S15 B). In this outlet venule you thus have a volume flow rate contribution from capillary without a hematocrit contribution. In this downstream vessel this ultimately results in an increase in flow rate with little change in  $\Delta P'$ . As this process repeatedly occurs, in the outlet venule there is a gradual decrease in resistance with a gradual increase in hematocrit (Figure S15 A).

(A)

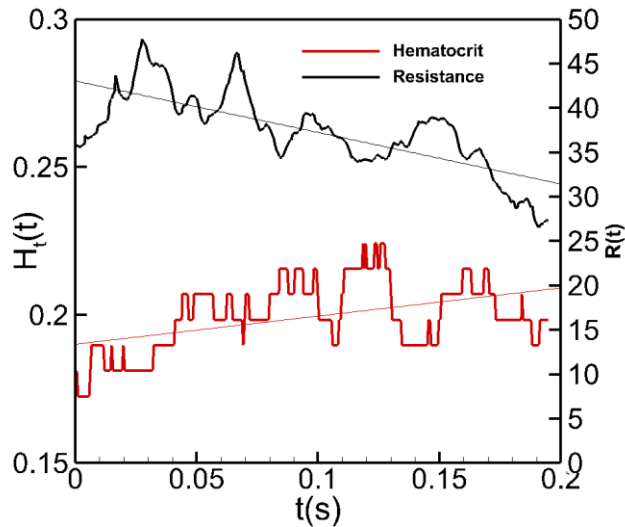

(B)

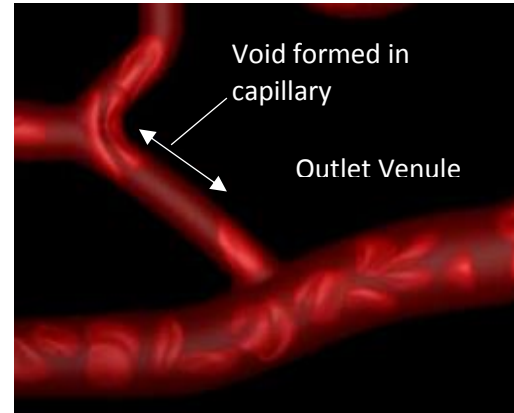

Figure S15: (A) Time-dependent hematocrit and resistance in outlet venule (shown in B) as an indirect result of void formation in the upstream capillary bifurcation. (B) Void formed in capillary, eventually traverses the vessel and discharges into the outlet venule.

## References

1. Cassot F, Lauwers F, Fouard C, Prohaska S, Lauwers-Cances V (2006) A novel three-dimensional computer-assisted method for a quantitative study of microvascular networks of the human cerebral cortex. *Microcirculation*, 13: 1-18.
2. Balogh P, Bagchi P (2017) A computational approach to modeling cellular-scale blood flow in complex geometry. *J. Comput. Phys.* 334: 280-307.
3. Skalak R, Tozeren A, Zarda RP, Chien S (1973) Strain energy function of red blood cell membranes. *Biophys. J.* 13: 245.
4. Yazdani A, Bagchi P (2013) Influence of membrane viscosity on capsule dynamics in shear flow. *J Fluid Mech* 718:569-595.
5. Zhong-Can OY, Helfrich W (1989) Bending energy of vesicle membranes: General expressions for the first, second, and third variation of the shape energy and applications to spheres and cylinders. *Phys. Rev. A* 3: 5280.
6. Yazdani AZ, Bagchi P (2012) Three-dimensional numerical simulation of vesicle dynamics using a front-tracking method. *Phys. Rev. E* 85: 056308.
7. Gaehtgens P, Duhresen C, Albrecht K, (1980) Motion, deformation and interaction of blood cells and plasma during flow through narrow capillary tubes. *Blood Cells*, 6: 799-812.



8. Lipowsky HH, Kovalcheck S, Zweifach BW (1978) The distribution of blood rheological parameters in the microvasculature of cat mesentery. *Circulation Res.* 43(5): 738-749.
